## 23 **Abstract**

24 Molecular diagnosis of helicobacters by PCR is simpler, more accurate, and feasible compared to  
25 other diagnostic methods. Validity and accuracy are highly dependent on the PCR primer design,  
26 diffusion time, and mutation rate of helicobacters. This study aimed to design 16srRNA -specific  
27 primers for *Helicobacter spp.* and *H. pylori*. Application of comparative statistical analysis of the  
28 diagnostic utility of the most available 16srRNA genus-specific primers. The new primers were  
29 designed using bioinformatics tools (MAFFT MSA and Gblocks command line). A comparative  
30 study was applied on nine genus-specific 16srRNA primers in comparison to the ConsH using  
31 Insilco and laboratory evaluation. The results demonstrated that the best specificity and  
32 sensitivity of the primers designed for this study compared to other primers. The comparative  
33 study revealed that the heminested outer/inner primers were the worst. Although  
34 H276,16srRNA(a), HeliS/Heli-nest, and Hcom had acceptable diagnostic utility, false positive  
35 and false negative results were obtained. Specificity testing on clinical samples indicated a  
36 surprising result; that *H. pylori* was not the sole enemy that we were looking for, but the NPH  
37 should be considered as a real risk prognostic for gastric diseases, consequently, a specific  
38 diagnosis and treatment should be developed. This study concluded that our designed primers  
39 were the most specific and sensitive in comparison with other primers. in addition, Insilco  
40 evaluation is not accurate enough for primer assessment and that the laboratory evaluation is  
41 mandatory.

## 42 **Keywords:**

43 *Helicobacter spp.*, *H. pylori*, 16srRNA, ROC, PCR, nested, bioinformatics

## 44 Introduction

45 Genus *Helicobacter* is a microaerophilic, helical, Gram-negative bacterium responsible  
46 for gastrointestinal disorders [1]. Thirty-four *Helicobacter spp.* have been identified so far  
47 according to LPSN (<http://www.bacterio.net/h/helicobacter.html>). It became evident that  
48 *Helicobacter spp.* can infect humans and various animal hosts and colonize different anatomical  
49 regions of the gastrointestinal tract [2].

50 *Helicobacter pylori* (*H. pylori*) was first recognized and considered a major cause of  
51 gastrointestinal disorders, including gastritis and peptic ulcers. Chronic infections are associated  
52 with gastric cancers and mucosal-associated lymphoid tissue lymphoma (type 1 gastric  
53 carcinogen by the International Agency for Cancer Research) in addition to several extra-gastric  
54 diseases [1, 3, 4].

55 *Helicobacter spp.* is assumed to be one of the most genetically diverse bacterial species  
56 studied to date [5]. Its genetic variability contributes to adaptation to changing environmental  
57 conditions via many approaches as antibiotic resistance development and the continuous surface  
58 antigen variation [6]. A wide range of genetic variability is attributed to substitution mutations  
59 [7], insertion elements [8], genetic rearrangement in the pathogenicity islands [9], the presence of  
60 prophages that causes genetic variations [10], and natural transformability demonstrated by many  
61 strains (11). *Helicobacter spp.* variability renders its diagnosis more challenging than many other  
62 genera.

63 Molecular diagnosis by polymerase chain reaction (PCR) is simpler, more accurate, and  
64 feasible compared to other invasive and non-invasive diagnostic procedures[12, 13, 14]. PCR is  
65 used for the detection of *H. pylori* DNA in various samples including gastric mucosa, feaces,

66 saliva, dental plaque, and other environmental samples [15]. It has succeeded in demonstrating  
67 an actual correlation between *H. pylori* infection and extra gastric digestive carcinogenesis as  
68 hepatic carcinoma, bile duct cancer, pancreatic cancer, and colon cancer [16, 17].

69 Molecular diagnostic methods using PCR especially nested PCR will be the gold standard  
70 in helicobacter diagnosis [18]. Although their use is still mainly restricted to research, it is  
71 gaining great popularity in the medical field [19]. It is noteworthy that the validity and accuracy  
72 of results are highly dependent on the PCR design and the time of its publication as new  
73 sequences are constantly submitted to databases [16, 20].

74 Certain target genes have been extensively used for the PCR detection of *Helicobacter*  
75 *spp.* and *H. pylori*, including the 16S rRNA gene, the 26K species-specific antigen gene, the  
76 *glmM* gene, the *ureA* gene, the *ureB* gene, the *cagA* gene, and the *vacA* gene [21–33]. The most  
77 sensitive and widely used gene for the detection of *Helicobacter* infections is PCR that targets  
78 the genus-specific and conserved region of the housekeeping gene, 16S rRNA [16, 34], which is  
79 present in all bacterial species. This small ribosomal subunit gene contains conserved regions  
80 that are used for the general amplification of bacterial DNA by utilizing universal primers.  
81 Comparison of DNA sequences from these PCR products is widely used in taxonomy,  
82 phylogenetic studies (35), and clinical microbiology [36]. In addition to the conserved regions,  
83 16S rRNA contains hypervariable regions that are highly specific for biological species or genera  
84 [37, 38].

85 Despite the various advantages of PCR, high mutation rates of *Helicobacter spp.*, the  
86 short primers, the low melting temperature, polymorphism in binding site at 3'end in protein-  
87 coding genes, and high melting temperature difference between forward and reverse primers  
88 (more than the recommended 4°C) affect amplification efficiency and may lead to false-negative

89 results [18, 19, 39, 40]. False-positive results may be attributed to the usage of non-specific  
90 primers and the detection of cDNA from non-pyloric helicobacter strains (NPH), this is  
91 particularly important in environmental samples which may contain previously uncultured  
92 organisms or NPH [15, 41].

93 The present study aimed to design new sets of primers specific to *Helicobacter spp.* and *H. pylori*  
94 using bioinformatics tools. Evaluation of these designed primers was performed by Insilico and  
95 experimental testing. Comparative Statistical analyses were applied for most 16srRNA primers  
96 for Genus *Helicobacter* detection.

## 97 **Material and Methods**

### 98 **1. Design new 16srRNA specific primers for G: *Helicobacter* and** 99 ***Helicobacter pylori*.**

100 **Selected strains for multiple sequence alignment (MSA) and determination**  
101 **of the G: *Helicobacter* and *H. pylori* conserved regions: *Helicobacter pylori***  
102 **(2017, 2018, 26695, 26695, 35A, 51, 52, 83 908, 17, Aklavik86, B38, B8, BM0(12A, 12S),**  
103 ***Cuz20, ELS37, F(16, 30, 32, 57), G27, Gambia94/24, HPAG1, HUP-B14, India7,***  
104 ***Lithuania75 OK113 DNA, OK310, P12, PeCan (18, 4), Puno(120, 135), Rif(1, 2), SJM180,***  
105 ***SNT49, Sat464, Shi(112, 169, 417, 470), South Africa(20, 7), UM(032, 037, 066, 298, 299),***  
106 ***XZ274, v225d, strain J99.* Non-pyloric *Helicobacter* (NPH) as *Helicobacter acinonychis str.*  
107 ***Sheeba, Helicobacter bizzozeronii CIII-1, Helicobacter cetorum (MIT 00-7128 and MIT 99-*****

108 5656), *Helicobacter cinaedi* (ATCC BAA-847 DNA and PAGU611). *Helicobacter felis* ATCC  
109 49179, *Helicobacter hepaticus* ATCC 51449, *Helicobacter mustelae* 12198.

110 **Multiple sequence alignment (MSA):** All 16srRNA gene sequences of all selected  
111 helicobacter strains were downloaded and saved in FASTA format to be used in MSA.  
112 MAFFT online version <https://mafft.cbrc.jp/alignment/server/> was used for MSA of all  
113 16srRNA gene sequences of the selected strains with a distance matrix by counting the  
114 number of shared 6mers between every sequence pair. A guide tree was built, and the  
115 sequences were aligned progressively according to the branching order, then the tree was re-  
116 constructed, and finally, a second progressive alignment was carried out. MAFFT was  
117 applied twice to obtain the outputs of Pearson/FASTA and Clustal.

118 **Gblocks tool command line for the determination of conserved regions:** To  
119 detect the conserved regions of the alignment, the Gblocks tool was used to yield an htm file  
120 that can be viewed using any browser. The MSA of all *Helicobacter spp.* 16srRNA gene  
121 sequences were collected in a file named **All\_strains\_16s.aln** and MSA of all *H. pylori*  
122 strains 16srRNA gene sequences were collected in a file named **All\_H\_pylori.aln**. **both files**  
123 **were used in The Gblocks command line in Terminal.**

124 \$ Gblocks All\_Strains\_16s.aln -t=d -p=y

125 \$ Gblocks All\_H\_pylori.aln -t=d -p=y

126 **The design of new specific PCR primers for *Helicobacter spp.* (ConsH) and**  
127 **nested primers for *H. pylori* (PyloA/PyloAN):** The conserved regions of all  
128 *Helicobacter spp.* and *H. pylori* were used in Thermofisher oligonucleotides design online

129 version <https://www.thermofisher.com/eg/en/home/life-science/oligonucleotides-primers->  
130 [probes-genes/custom-dna-](https://www.thermofisher.com/eg/en/home/life-science/oligonucleotides-primers-)  
131 [oligos.html?s\\_kwid=AL13652!3!506722412345!p!!g!!thermo%20primer&ef\\_id=CjwKCAj](https://www.thermofisher.com/eg/en/home/life-science/oligonucleotides-primers-)  
132 [w\\_o-HBhAsEiwANqYhp\\_8UC-](https://www.thermofisher.com/eg/en/home/life-science/oligonucleotides-primers-)  
133 [ah9JbbfjH6\\_l3wIt2XPuxGgihQjVGVJBB5ny9X8hWdECQ3hxoCa7oQAvD\\_BwE:G:s&s\\_k](https://www.thermofisher.com/eg/en/home/life-science/oligonucleotides-primers-)  
134 [wcid=AL13652!3!506722412345!p!!g!!thermo%20primer&cid=bid\\_mol\\_pch\\_r01\\_co\\_cp135](https://www.thermofisher.com/eg/en/home/life-science/oligonucleotides-primers-)  
135 [8\\_pjt0000\\_bid00000\\_0se\\_gaw\\_bt\\_pur\\_con&gclid=CjwKCAjw\\_o-](https://www.thermofisher.com/eg/en/home/life-science/oligonucleotides-primers-)  
136 [HBhAsEiwANqYhp\\_8UC-](https://www.thermofisher.com/eg/en/home/life-science/oligonucleotides-primers-)  
137 [ah9JbbfjH6\\_l3wIt2XPuxGgihQjVGVJBB5ny9X8hWdECQ3hxoCa7oQAvD\\_BwE](https://www.thermofisher.com/eg/en/home/life-science/oligonucleotides-primers-), Which  
138 was used to design primers for PCR. Many probabilities were obtained for forward and  
139 reverse primers. Every pair was tested to select the most suitable pair.

## 140 **2. Evaluation of the newly designed primers:**

### 141 **Insilco evaluation by primer-Blast and Insilco PCR amplification:**

142 ConsH and PyloA/PyloAN primers were examined by primer-Blast online software  
143 <https://www.ncbi.nlm.nih.gov/tools/primer-blast/>. The primers were also subjected to Insilco  
144 PCR amplification using online software <http://insilico.ehu.es/> against 62 *Helicobacter*  
145 strains including 53 *Helicobacter pylori* strains and 9 non-pyloric *Helicobacter* strains.

### 146 **Laboratory evaluation:**

147 **DNA extraction:** The whole genome was extracted from three different samples, local  
148 isolate, gastric biopsies, and stool samples. DNA extraction using different extraction kits,

149 Thermo scientific GeneJET Genomic DNA Purification kit#K0722, QIAamp DNA stool  
150 Mini kit#51604, and GF-1 Tissue DNA Extraction kit Vivantis cat.no:GF-TD-100

151 **PCR:** The PCR mixture included 1x master mix (amaR OnePCR™, Cat.No. SM213-0250,  
152 GeneDireX, Inc.), 0.25 μmol forward and reverse primers, 10 ng DNA, and up to 20 μl  
153 nuclease-free water.

154 The amplification cycle for ConsH, pyloA/PyloAN was as follow: initial denaturation at  
155 94°C/3 minutes, 30 cycles of the following temperatures: 94°C/30 sec, annealing at 60°C/1  
156 minutes, and cyclic extension at 72°C/2 minutes, final extension at 72°C/5 minutes. Half a  
157 microliter of PCR product for the first nested PCR (PyloA) was amplified in the second PCR  
158 (PyloAN) for 20 cycles. Gel electrophoresis of the PCR products was performed in 1.5%  
159 agarose (Vivantis, cat.no: pco701) against a 100 bp DNA ladder (Vivantis, cat.no:NL1405).

160 **Specificity testing:** PCR application of newly designed primers using eight sequenced  
161 Helicobacter strains (5 *H. pylori* and 3 non-pyloric Helicobacter, *H. hepaticus*, *H. cinidiae*,  
162 and *H. felis*) and 10 non-Helicobacter bacteria present in GIT included *E. coli*, *Klebsiella*  
163 *pneumoniae*, *Salmonella spp.*, *Proteus mirabilis*, *Enterococcus fecalis*, *Enterobacter spp.*,  
164 *Staphylococcus aureus*, *Streptococcus mutans*, *Pseudomonas aeruginosa*, and *Candida*  
165 *albicans*. All bacterial strains were sequenced reference. The newly designed primers were  
166 applied clinically as mentioned before on 243 gastric biopsies taken from dyspeptic patients  
167 admitted to Ahmed Maher Hospital (180 samples), El-Maadi Military Hospital (38 samples),  
168 and Military production Hospital in Helwan (25 samples). The patients were tested in the  
169 hospital by different invasive methods like endoscopic pictures, histopathology, and rapid  
170 urea test (RUT). This study was approved by the Research Ethics Committee process number



171 (HAM00116). The PCR positive samples were confirmed by the different invasive methods  
172 and sequencing of the PCR products.

173 **Sensitivity testing:**

174 Serially diluted DNA of the whole genome of *H. pylori* (Local isolate) was introduced into a  
175 negative stool and biopsy samples in the following concentration (5 ng, 0.5 ng, 50 pg, 5 pg,  
176 0.5pg/ $\mu$ l). The final concentration in total volume PCR mixture (250 pg, 25 pg, 2.5 pg, 0.25  
177 pg, 25 fg) [42].

178 **3. Comparative analysis between the newly designed primer**  
179 **ConsH and different 16srRNA primers for Helicobacter spp.**  
180 **detection:**

181 **The 16srRNA specific primers used in the comparative study:** The  
182 comparative study was performed on 9 primers for the detection of G: Helicobacter  
183 compared to the newly designed primer in this study (ConsH) (**Table 1**).

184 **Insilco comparative study:** These primers were examined by primer-blast and  
185 subjected to Insilco PCR amplification.

186 **Laboratory comparative study (specificity testing):** PCR application of the  
187 comparable primers was performed on the sequenced Helicobacter strains and non-  
188 helicobacter strains.

189       **4. Statistical evaluation of the diagnostic utility of different**  
190               **16srRNA primers for G: Helicobacter detection in the**  
191               **literature:**

192       **Gold standard primer selection:** The selected gold standard primer for evaluation was  
193       the most specific one which gave negative results with all non-Helicobacter strains and  
194       positive results with all sequenced Helicobacter strains.

195       **Statistical methodology:**

196       The sensitivity (true positive rate, TPR), specificity (true negative rate, TNR), positive  
197       predictive value (PPV) and negative predictive value (NPV), false-positive rate (FPR), false-  
198       negative rate (FNR), positive likelihood ratio (LR+), negative likelihood ratio (LR-),  
199       accuracy (ACC), balanced accuracy (BA) and diagnostic odds ratio (DOR) were calculated  
200       for insilco and laboratory comparison of the nine comparable primers. Statistical analyses of  
201       screening tests for Helicobacter *spp.* using different primers were performed using Chi-  
202       square. Receiver Operating Characteristics (ROC) analysis for each screening test, the true  
203       positive rate (TPR) against false positive rate (FPR) can be measured compared to the gold  
204       standard. Values of  $p \leq 0.05$  were considered statistically significant. Analyses were  
205       performed via SPSS version 26 software (SPSS Inc, Chicago, IL, USA) and R version 4.1.1  
206       (R Foundation for Statistical Computing), with the ‘epiR’ package [43, 44].

207 **Data availability:** Helicobacter DNA sequences were submitted to NCBI Genbank  
208 with the following accession numbers OL630959, OL631133, OL631225, OL631585,  
209 OL634782, OL634838, OL631152, OL631161and, OL631249.

## 210 **Results:**

### 211 **1. The newly designed 16srRNA specific primers for Helicobacter** 212 ***spp.* and *H. pylori*:**

213 The conserved regions of the 16srRNA gene-specific to all helicobacters and all *H. pylori*  
214 strains are demonstrated in **Table 2**; whereas the conserved regions used in the design of  
215 highly specific primers are demonstrated in **Table 3**. The first conserved area of Helicobacter  
216 *spp.* was used for designing the genus-specific primer (ConsH) and the second conserved  
217 area of *H. pylori* was used for designing the *H. pylori* specific nested primer (PyloA/  
218 PyloAN).

### 219 **2. Evaluation of the newly designed primers:**

220 **Insilco evaluation by BLAST and Insilco PCR amplification:** ConsH primer  
221 corresponds to 383 *H. pylori* and 18 NPH by primer-blast analysis. The nested primer  
222 (PyloA/PyloAN) corresponds to 281 *H. pylori* strains. Insilco PCR amplification revealed  
223 that ConsH primer gave a positive band of 435 bp in 60 Helicobacter strains (96.8%). The  
224 nested primer (PyloA/PyloAN) revealed positive bands of 1274 bp (first nested, PyloA) and  
225 160 bp (second nested, PyloAN) in 61 Helicobacter strains (98.4%).

226        **Laboratory evaluation:**

- 227        • **Specificity testing:** The ConsH obtained positive bands of 435 bp with all helicobacters  
228            and negative results with all non-helicobacter strains. The *H. pylori*-specific nested  
229            primer (PyloA/PyloAN) produced positive bands of 1274 bp in the first pair and 160 bp  
230            in the second pair with all five *H. pylori* strains and negative results with all NPH and  
231            non-helicobacter strains. The results of PCR application in 243 clinical biopsy samples  
232            revealed 99 positive samples for Helicobacter *spp.* by ConsH primer (40.7%), from these  
233            positive samples, 66% were *H. pylori* and 33% were NPH. The positive cases were  
234            confirmed by sequencing (**Fig 1**).
- 235        • **Sensitivity testing:** The detection limit of ConsH primer was 250 pg and 25pg in stool  
236            and biopsy clinical samples, respectively, while the detection limit of PyloA was 0.25 fg  
237            and 0.25pg in stool and biopsy clinical samples respectively (**Fig 2**).

238        **3. Comparative analysis between the newly designed primer**  
239            **ConsH and different 16srRNA primers for G: Helicobacter**  
240            **detection:**

241        **Insilco comparative analysis: Primer Blast** revealed that H276 primer correlates  
242            with 277 *H. pylori* and 56 NPH, whereas 16srRNA(b) matches 401 *H. pylori*, outer/inner  
243            primers are compatible with 283 *H. pylori* and 48 NPH, HeliS-Helinet match 329 *H.*  
244            *pylori*, and 115 NPH. 16srRNA(a) doesn't match any Helicobacter. Hcom corresponds to  
245            282 *H. pylori* and 13 NPH. BFHpyl matches 312 *H. pylori* and 3 NPH. Heid correlates  
246            with 297 *H. pylori* and 2 NPH. The positive percent of Insilco PCR amplification is  
247            explained as follows: H276 and outer/inner primers gave positive in 60 Helicobacters

248 (96.8%), Hcom1 gave positive with 61 Helicobacters (98.4%). 16srRNA (a) and BFHpyl  
249 gave positive with only one Helicobacter (*H. pylori* 26695 and *H. pylori* G27,  
250 respectively). 16srRNA (b) and Heid didn't produce any bands with all Helicobacters.

251 **Laboratory comparative study:** H276, outer/inner, Hcom1, Heli-nest/HeliS, and  
252 16srRNA (a) yielded positive results with all eight Helicobacters, 16srRNA (b ) relented  
253 positive results with six Helicobacters, BFHpyl revealed a positive band with only one *H.*  
254 *pylori* while Heid primer gave negative with all Helicobacter *spp.* Nonspecific results  
255 were obtained with other Non-helicobacters as follows: H276 (*S. mutans*), Heli-  
256 nest/HeliS (*Salmonella spp.*), Hcom1 and BFHpyl (*K. pneumoniae* ), 16srRNA (a) (*E.*  
257 *fecalis*), Heid (*E. coli*) while outer/inner primer gave positive results with all non-  
258 helicobacters.

259 **Statistical evaluation of the diagnostic utility of different 16srRNA**  
260 **primers for Helicobacter *spp.* detection:** ConsH matched all criteria considered  
261 for the gold standard selection. The statistical evaluation parameters according to Insilco  
262 PCR amplification are described in **Table 4**. The outer/inner primers had 100%  
263 specificity and sensitivity with a *P*-value of 0.0001. Hcom1, H276, and HeliS/Heli-nest  
264 had 50% SP. The utility is measured also by the receiver operating characteristics (ROC)  
265 analysis expressed by the area under the curve (AUC), the ROC analysis of the Insilco  
266 evaluation is demonstrated in **Fig 3**. The laboratory evaluation showed 0.00% SP with  
267 hemined outer/inner primers with *P*-value=1. The H276, 16srRNA(a), HeliS/Heli-nest,  
268 and Hcom had 90% specificity with *P*-value= 0.001. Although 16srRNA(b) had 100%

269 specificity, it had 75% sensitivity with a  $P$ -value=0.004. The ROC analysis of laboratory  
270 comparison is demonstrated in **Fig 4**.

## 271 **Discussion:**

272 The present study demonstrated the whole process of designing novel sets of  
273 highly specific primers targeting 16srRNA conserved region by bioinformatics tools,  
274 ConsH for detecting G: Helicobacter, and nested primers for *H. pylori* detection  
275 (PyloA/PyloAN). The design process was followed by evaluation of the diagnostic utility  
276 of the primers in comparison to a group of widely used 16srRNA primers in literature,  
277 and statistical monitoring of the diagnostic utility of the comparable primers used in  
278 *Helicobacter spp.* diagnosis.

279 Efficient PCR performance is highly dependent on PCR primer design,  
280 consequently one must spend a notable effort on the primer design. Well-designed PCR  
281 primers not only augment specificity and sensitivity but also reduce the effort spent on  
282 the experimental optimization [45].

283 PCR diagnosis especially nested PCR may be regarded as the gold standard for  
284 *Helicobacter* diagnosis through the construction of specific primers. Nested PCR  
285 provides higher sensitivity by excluding false-negative results due to low bacterial counts  
286 and PCR inhibitors [18]. PCR yielded a higher detection rate (40.8%) compared to histo-  
287 pathology (36.7%) and can be suitable for patients unfit for endoscopic examination [46].

288 The choice of 16srRNA gene in PCR diagnosis of *Helicobacter* diseases was  
289 supported by a systematic review and meta-analysis conducted on various sources,

290 including MEDLINE, Web of Sciences, and the Cochrane Library from April 1, 1999, to  
291 May 1, 2016. The most diagnostic candidate genes according to statistical parameters  
292 were 23S rRNA, 16S rRNA, and *glmM* [47]. The urgent demand for rapid accurate  
293 Helicobacter detection puts an obligation for the construction of novel specific primers.

294 Both the ConsH and PyloA/PyloAN primers were synthesized according to the  
295 bioinformatic tools with primer designs criteria which ensures efficient PCR  
296 performance. The primer' lengths fall within the recommended 18-30 nucleotides,  
297 shorter primers can produce non-specific results, and longer primers can form secondary  
298 structures and reduce PCR efficiency. Primers GC contents are within 48-52 %, and the  
299 difference between the melting temperatures of the forward and reverse primers was  
300 within 4°C versus other compared primers as 16srRNA (a), Hcom, and Heli-nest primers  
301 which have larger than 4°C difference between the primers. This may cause false  
302 negatives [48, 49].

303 The evaluation of the newly designed primers was performed by Insilco tools and  
304 laboratory test (PCR). The results of the Insilco evaluation were very promising as  
305 ConsH matched with Helicobacters only and no mismatching with other bacteria, also the  
306 nested primers for *H. pylori* (PyloA/PyloAN) matches only with *H. pylori*. Insilco PCR  
307 amplification showed highly encouraging results. The advantages of Insilco evaluation  
308 are low cost and timesaving for evaluation as it gives a preliminary decision about the  
309 newly designed primer sets. Nonetheless, the Insilco evaluation is not a confirmatory  
310 method for evaluation due to continuously submitting uncurated sequences into  
311 GenBank, therefore, laboratory evaluation is mandatory [50].

312 In the laboratory evaluation, the newly designed primers showed sufficient  
313 results. The specificity testing revealed significant results as ConsH detected all  
314 Helicobacters and the nested primer (PyloA/PyloAN) identified all five *H. pylori* strains  
315 without mismatching with Non-pyloric Helicobacters. They did not select any non-  
316 Helicobacter bacteria. The clinical precision testing by PCR was applied on gastric  
317 biopsies from dyspeptic patients introduced to the endoscope unit in the mentioned  
318 hospitals, revealing that all PCR results are consistent with the invasive methods applied  
319 (RUT and Histopathology). The positive PCR by sequencing confirmed the presence of  
320 Helicobacter DNA in the samples [51–53]. The ConsH detected 40.7% positive samples,  
321 from the positive Helicobacter *spp.* PCR, the nested PCR detected 61.3% *H. pylori* and  
322 39.7% NPH. These findings are concerning because there is an unexpected hidden  
323 unexpected enemy in the form of NPH, hence, diagnosis and treatment guidelines should  
324 be changed to consider the NPH beside *H. pylori*.

325 In the present study, the designed primers showed considerable sensitivity to low  
326 concentrations of specific DNA in clinical samples, allowing sensitive detection in  
327 different types of contaminated samples [54].

328 Here comes the answer to an important question about the need for a newly  
329 designed set of specific primers instead of the primers used in the literature. Insilco and  
330 laboratory comparative analysis should be established to determine the diagnostic utility  
331 of 16srRNA primers for genus-level identification of Helicobacter *spp.* Insilco  
332 comparison showed reasonable results for H276, 16srRNA(a), heminested outer/inner,  
333 and nested HeliS-Helinst by primer-blast but did not achieve substantial findings with  
334 16srRNA(b). Insilco PCR amplification gave promising results with H276(96.8%), Hcom



335 (98.4%), nonetheless, the results were poor for 16srRNA(b), BFHpyl, 16srRNA(a), and  
336 Heid primers. From the mentioned results, the Insilco evaluation is not an accurate  
337 method for a real evaluation of any primer but is only a preliminary step, so laboratory  
338 evaluation is the confirmatory method for accurate evaluation. The specificity test  
339 revealed that ConsH primer is the best one in this marathon, as it has all considerations to  
340 be the gold standard primer for statistical evaluation of the comparable primers. The  
341 results of the laboratory concluded that the comparable primers offered false-positive  
342 results by non-specific binding to non-Helicobacter bacteria and some of them gave false-  
343 negative results as BFHpyl, Heid, and 16srRNA(b).

344 The comparative study was analyzed statistically to assess the diagnostic utility.  
345 The diagnostic parameters and ROC analysis of Insilco and laboratory evaluation are  
346 demonstrated in **Tables 4, 5**, and **Figs 3, 4**, which concluded that the Insilco evaluation is  
347 not accurate enough to assess the diagnostic utility of any primer. That was evident in the  
348 case of heminested outer/inner primer which showed excellent diagnostic significance ( $P$ -  
349 0.0001), 100% in most diagnostic parameters, and the best score of AUC (1.00) in ROC  
350 analysis. These results differ in the laboratory evaluation. This heminested primer  
351 produced false-positive results because it achieved positive PCR with all non-  
352 Helicobacter bacteria with 0.00% specificity (**Table 5**) and AUC (0.5) (**Fig 4**), which  
353 demonstrated the unreliability of heminested outer/inner primer for G: Helicobacter  
354 diagnosis. The aforementioned findings disagree with Qin *et.al.*, who confirmed its  
355 reliability for G: Helicobacter identification and that it is a powerful diagnostic tool [55].  
356 Hcom1, H276, and nested primer (HeliS/Heli-nest) indicated non-significant results for  
357 their use in G: Helicobacter diagnosis by Insilco PCR amplification (**Table 4**) and

358 considered insignificant tool for diagnosis, as they had AUC less than 0.8 in ROC  
359 analysis tool. The laboratory evaluation of these primers demonstrated a major difference  
360 with Insilco evaluation as the statistical analysis revealed that they had significant  
361 diagnostic utility ( $P=0.001$ ) and were considered reliable for *Helicobacter spp.* diagnosis  
362 with AUC (0.950) in ROC analysis [56- 58]. However, the results of the current study are  
363 incompatible with Flahou *et al.*, that Hcom1 is suitable for the identification of  
364 *Helicobacter spp.* [59], as it may give false-positive results with *K. pneumoniae*. H276  
365 may give positive results with *S. mutans* found in the buccal cavity [60]. The present  
366 study disagrees with Riley *et al.*, who developed this primer and concluded that it was  
367 sensitive and specific to detect several numbers of *Helicobacters* and it was suitable for  
368 routine diagnosis [57]. The nested primers (HeliS/Heli-nest) gave positive results with  
369 *Salmonella spp.* which is alarming due to misdiagnosis of gastrointestinal disturbance of  
370 *Helicobacteriosis* and *Salmonellosis* [58].

371 16srRNA (a,b) were unreliable based on Insilco evaluation, but have a  
372 significance for diagnosis of *Helicobacters* ( $P= 0.001$  and  $0.004$ , respectively) and an  
373 acceptable AUC (0.875, 0.950, respectively) in ROC analysis. However, false-positive  
374 results may be detected in 16srRNA (b) with *E. fecalis*. Low sensitivity obtained with  
375 16srRNA(a) (Se 75%). Consequently, these results disagree with Idowu *et al.*, and tiwari  
376 *et al.*, who concluded their specificity and sensitivity in *Helicobacter spp.* diagnosis [58,  
377 61]. Finally, the worst primers that appeared in our study were clearly demonstrated in  
378 BFHpyl and Heid which have the lowest significance in Insilco and laboratory evaluation  
379 ( $P=1.00$ ) and low AUC (0.513, 0.450, respectively) by ROC analysis (Table 5) (Fig 3, 4).  
380 These results disagree with Flahou *et al.*, and Farshad [59, 62].

381 Our study explained a suitable comparative analysis of different primers for  
382 Helicobacters diagnosis by using ROC analysis and different statistical diagnostic  
383 parameters. Use of bioinformatics tools and command line to extract conserved regions  
384 of 16srRNA gene in Helicobacter *spp.* and *H. pylori* are used in the design of primers.  
385 Considerable detailed evaluation of the newly designed primers by specificity using  
386 sequenced Helicobacters and non-Helicobacters carefully selected from GIT microbes.  
387 Application of the designed primers in clinical samples (gastric biopsies) using sufficient  
388 representative sample size from dyspeptic patients introduced to three hospitals. The  
389 results were compared with the routine diagnosis in the hospitals and sequencing of the  
390 PCR products. Sensitivity testing was performed to find the detectable DNA  
391 concentration in highly contaminated samples (Stool). However, more non-Helicobacters  
392 and sequenced local Helicobacter strains should be used, and that will be considered in  
393 our future studies.

394

## 395 **Conclusion:**

396 Our designed primers ConsH and PyloA/PyloAN are highly sensitive and specific  
397 and can be used for accurate diagnosis of Helicobacter diseases from different clinical  
398 samples. Moreover, PyloA/PyloAN indicated the abundance of non-pyloric Helicobacters  
399 and their unrecognized role in Helicobacteriosis. It can also be concluded that Insilco  
400 evaluation is not adequately accurate to assess the diagnostic utility of the primers and  
401 must be accompanied by the laboratory evaluation.

## 402 **Acknowledgment:**

403 This study was supported by the hospitals which supported us with the clinical samples,  
404 Ahmed Maher Hospital, Military production hospital in Helwan, and El-Maadi Military  
405 hospital, Cairo, Egypt.

## 406 **References**

407

- 408 1. Parsonnet J, Shmueli H, Haggerty T. Fecal and oral shedding of *Helicobacter pylori* from  
409 healthy infected adults. *Journal of the American Medical Association*. 1999; 282:2240–  
410 2245.
- 411 2. Recordati C, Gualdi V, Craven M, Sala L, Luini M, Lanzoni A, Rishniw M, Simpson KW,  
412 Scanziani E. Spatial Distribution of *Helicobacter spp.* in the Gastrointestinal Tract of Dogs.  
413 *Helicobacter*. 2009; 14:180–191.
- 414 3. Malfertheiner P, Megraud F, O’Morain C, Gisbert JP, Kuipers EJ, Axon A, Bazzoli F,  
415 Gasbarrini A, Atherton J, Graham DY, Hunt R, Moayyedi P, Rokkas T, Rugge M, Selgrad  
416 M, Suerbaum S, Sugano K, El-Omar E, Agreus L, Andersen LP, Coelho L, Delchier JC,  
417 Di Mario F, Dinis-Ribeiro M, Fischbach W, Flahou B, Fock KM, Gasbarrini G, Gensini  
418 G, Goh KL, Herrero R, Kupcinskis L, Lanas A, Leja M, Machado JC, Mahachai V,  
419 Milosavljevic T, Niv Y, Ristimaki A, Tepes B, Vaira D, Vieth M, You W. Management of  
420 *Helicobacter pylori* infection-the Maastricht V/Florence consensus report. 2017; 66:6–30.
- 421 4. Ansari S, Yamaoka Y. Current understanding and management of *Helicobacter*  
422 *pylori* infection: an updated appraisal. *F1000Res*. 2018 Jun 11;7:F1000 Faculty Rev-721.  
423 doi: 10.12688/f1000research.14149.1. PMID: 29946428; PMCID: PMC5998008.

- 424 5. Falush D, Wirth T, Linz B, Pritchard JK, Stephens M, Kidd M, Blaser MJ, Graham DY,  
425 Vacher S, Perez-Perez GI, Yamaoka Y, Mégraud F, Otto K, Reichard U, Katzowitsch E,  
426 Wang X, Achtman M, Suerbaum S. Traces of human migrations in *Helicobacter pylori*  
427 populations. *Science* (New York, NY). 2003; 299:1582–1585.
- 428 6. Wang G, Taylor DE, Humayun MZ. Mutation as an origin of genetic variability in  
429 *Helicobacter pylori*. *Trends in Microbiology*. 1999; 7:488–493.
- 430 7. Suerbaum, S., & Josenhans, C. *Helicobacter pylori* evolution and phenotypic  
431 diversification in a changing host. *Nature reviews Microbiology*. 2007; 5:441–452.
- 432 8. Kalia A, Mukhopadhyay AK, Dailide G, Ito Y, Azuma T, Wong BC, Berg DE.  
433 Evolutionary dynamics of insertion sequences in *Helicobacter pylori*. *Journal of*  
434 *bacteriology*. 2004; 186:7508–7520.E.
- 435 9. Khatoon J, Prasad KN, Prakash Rai R, Ghoshal UC, Krishnani N. Association of  
436 heterogenicity of *Helicobacter pylori* cag pathogenicity island with peptic ulcer diseases  
437 and gastric cancer. *British journal of biomedical science*. 2017; 74:121–126.
- 438 10. Hanafiah A, Lopes BS. Genetic diversity and virulence characteristics of *Helicobacter*  
439 *pylori* isolates in different human ethnic groups. *Infect Genet Evol*. 2020 Mar;78:104135.  
440 doi: 10.1016/j.meegid.2019.104135. Epub 2019 Dec 16. PMID: 31837482.
- 441 11. Suerbaum S, Blaser MJ. *Helicobacter Pylori*. *Encyclopedia of Microbiology*. 2009;163–  
442 169.

- 443 12. Engstrand L., Nguyen AM, Graham DY, and el-Zaatari FA. Reverse transcription and  
444 polymerase chain reaction amplification of rRNA for detection of *Helicobacter* species.  
445 *Journal of clinical microbiology*. 1992; 30:2295–2301.
- 446 13. Myung SJ, Kim MH, Shim KN, Kim YS, Kim EO, Kim HJ, Park ET, Yoo KS, Lim BC,  
447 Seo DW, Lee SK, Min YI, Kim JY. Detection of *Helicobacter pylori* DNA in human  
448 biliary tree and its association with hepatolithiasis. *Digestive diseases and sciences*. 2000;  
449 45:1405–1412.
- 450 14. Monstein HJ and Ellnebo-Svedlund K. Molecular typing of *Helicobacter pylori* by  
451 virulence-gene based multiplex PCR and RT-PCR analysis. *Helicobacter*. 2002; 7:287–  
452 296.
- 453 15. Sugimoto M, Wu JY, Abudayyeh S, Hoffman J, Brahem H, Al-Khatib K, Yamaoka Y,  
454 Graham DY. Unreliability of results of PCR detection of *Helicobacter pylori* in clinical or  
455 environmental samples. *Journal of Clinical Microbiology*. 2009; 47(3): 738-742.  
456 <https://doi.org/10.1128/JCM.01563-08>
- 457 16. Bulajic M, Panic N, Stimec B, Isaksson B, Jesenofsky R, Schneider-Brachert W, Löhr JM.  
458 PCR in *Helicobacter spp.* diagnostic in extragastric malignancies of digestive system.  
459 *European Journal of Gastroenterology and Hepatology*. 2012; 24:117–125.
- 460 17. Fox JG, Dewhirst FE, Shen Z, Feng Y, Taylor NS, Paster BJ, Ericson RL, Lau CN, Correa  
461 P, Araya JC, Roa I. Hepatic *Helicobacter* species identified in bile and gallbladder tissue  
462 from Chileans with chronic cholecystitis. *Gastroenterology*. 1998; 114:755–763.

- 463 18. Patel SK, Pratap CB, Jain AK, Gulati AK, Nath G. Diagnosis of *Helicobacter pylori*:  
464 What should be the gold standard? *World Journal of Gastroenterology*. 2014; 20:12847–  
465 12859.
- 466 19. Calvet X. Diagnosis of *Helicobacter pylori* Infection in the Proton Pump Inhibitor Era.  
467 *Gastroenterology Clinics of North America*. 2015; 44:507–518.
- 468 20. Poynter S, Phipps JD, Naranjo-Pino A, Sanchez-Morgado JM. Difficulties in the  
469 molecular diagnosis of *Helicobacter* rodent infections. *Veterinary Microbiology*. 2009;  
470 134:272–278.
- 471 21. Goosen C, Theron J, Ntsala M, Maree FF, Olckers A, Botha SJ, Lastovica AJ, and van der  
472 Merwe S W. Evaluation of a novel heminested PCR assay based on the  
473 phosphoglucosamine mutase gene for detection of *Helicobacter pylori* in saliva and dental  
474 plaque. *Journal of clinical microbiology*. 2002; 40:205–209.
- 475 22. Li C, Musich PR, Ha T, Ferguson DA, Jr, Patel NR, Chi DS, and Thomas E. High  
476 prevalence of *Helicobacter pylori* in saliva demonstrated by a novel PCR assay. *Journal of*  
477 *clinical pathology*. 1995;48:662–666.
- 478 23. Chisholm SA, Owen RJ, Louise Teare E, Saverymuttu S. PCR-based diagnosis of  
479 *Helicobacter pylori* infection and real-time determination of clarithromycin resistance  
480 directly from human gastric biopsy samples. *Journal of Clinical Microbiology*. 2001;  
481 39:1217–1220.
- 482 24. Koehler CI, Mues MB, Dienes HP, Kriegsmann J, Schirmacher P, and Odenthal M.  
483 *Helicobacter pylori* genotyping in gastric adenocarcinoma and MALT lymphoma by

- 484 multiplex PCR analyses of paraffin wax embedded tissues. *Molecular pathology*. 2003;  
485 56:36–42.
- 486 25. Hulten K, Han SW, Enroth H, Klein PD, Opekun AR, Gilman RH, Evans DG, Engstrand  
487 L, Graham DY, El-Zaatari FA. *Helicobacter pylori* in the drinking water in Peru.  
488 *Gastroenterology*. 1996; 110:1031–1035.
- 489 26. Lage AP, Godfroid E, Fauconnier A, Burette A, Butzler JP, Bollen A, Glupczynski Y.  
490 Diagnosis of *Helicobacter pylori* infection by PCR: Comparison with other invasive  
491 techniques and detection of *cagA* gene in gastric biopsy specimens. *Journal of Clinical*  
492 *Microbiology*. 1995; 33:2752–2756.
- 493 27. Mapstone NP, Lynch DAF, Lewis FA, Axon ATR, Tompkins DS, Dixon MF, Quirke P.  
494 Identification of *Helicobacter pylori* DNA in the mouths and stomachs of patients with  
495 gastritis using PCR. *Journal of Clinical Pathology*. 1993; 46:540–543.
- 496 28. Miyabayashi H, Furihata K, Shimizu T, Ueno I, Akamatsu T. Influence of Oral  
497 *Helicobacter pylori* on the Success of Eradication Therapy Against Gastric *Helicobacter*  
498 *pylori*. *Helicobacter*. 2000; 5:30–37.
- 499 29. Park CY, Kwak M, Gutierrez O, Graham DY, Yamaoka Y. Comparison of genotyping  
500 *Helicobacter pylori* directly from biopsy specimens and genotyping from bacterial  
501 cultures. *Journal of Clinical Microbiology*. 2003; 41:3336–3338.
- 502 30. Song Q, Haller B, Schmid RM, Adler G, Bode G. *Helicobacter pylori* in dental plaque: a  
503 comparison of different PCR primer sets. *Dig Dis Sci*. 1999 Mar;44(3):479-84. doi:  
504 10.1023/a:1026680618122. PMID: 10080137.



- 505 31. Peek RM, Miller GG, Tham KT, Pérez-Pérez GI, Cover TL, Atherton JC, Dunn GD,  
506 Blaser MJ. Detection of *Helicobacter pylori* gene expression in human gastric mucosa.  
507 *Journal of clinical microbiology*. 1995; 33:28–32.
- 508 32. Smith SI, Oyedeji KS, Arigbabu AO, Cantet F, Megraud F, Ojo OO, Uwaifo AO,  
509 Otegbayo JA, Ola SO, Coker AO. Comparison of three PCR methods for detection of  
510 *Helicobacter pylori* DNA and detection of *cagA* gene in gastric biopsy specimens. *World*  
511 *journal of gastroenterology*. 2004; 10:1958–1960.
- 512 33. Wang J, Chi DS, Laffan JJ, Li C, Ferguson DA, Litchfield P, Thomas E. Comparison of  
513 cytotoxin genotypes of *Helicobacter pylori* in stomach and saliva. *Digestive Diseases and*  
514 *Sciences*. 2002; 47:1850–1856.
- 515 34. Battles JK., Williamson JC, Pike KM, Gorelick PL, Ward JM, Gonda MA. Diagnostic  
516 assay for *Helicobacter hepaticus* based on nucleotide sequence of its 16S rRNA gene.  
517 *Journal of clinical microbiology*. 1995; 33:1344–1347.
- 518 35. Rosselló-móra R. Minireview Towards a taxonomy of Bacteria and Archaea based.  
519 *Environ Microbiol*. 2012 Feb;14(2) 14:318–334.
- 520 36. Sontakke S, Cadenas MB, Maggi RG, Paulo P, Diniz VP, Breitschwerdt EB. Use of broad  
521 range 16S rDNA PCR in clinical microbiology. *Journal of Microbiological Methods*.  
522 2009;76:217–225.
- 523 37. Chakravorty S, Helb D, Burday M, Connell N. A detailed analysis of 16S ribosomal RNA  
524 gene segments for the diagnosis of pathogenic bacteria *J Microbiol Methods*. 2007 May;  
525 69:330–339.

- 526 38. Schriefer AE, Cliften PF, Hibberd MC, Sawyer C, Brown-kennerly V, Burcea L, Klotz E,  
527 Crosby SD, Gordon I, Head RD. A multi-amplicon 16S rRNA sequencing and analysis  
528 method for improved taxonomic profiling of bacterial communities. *J Microbiol Methods*.  
529 2018 Nov;154:6-13.
- 530 39. Miftahussurur M, Yamaoka Y. Diagnostic Methods of Helicobacter pylori Infection for  
531 Epidemiological Studies: Critical Importance of Indirect Test Validation. *Biomed Res Int*.  
532 2016. doi: 10.1155/2016/4819423. Epub 2016 Jan 19. PMID: 26904678; PMCID:  
533 PMC4745376.
- 534 40. Mounsey A, Leonard EA. Noninvasive Diagnostic Tests for Helicobacter pylori Infection.  
535 *Am Fam Physician*. 2019 Jul 1;100(1):16-17. PMID: 31259496.
- 536 41. Talebi Bezmin Abadi A. Diagnosis of Helicobacter pylori Using Invasive and  
537 Noninvasive Approaches. *J Pathog*. 2018 May 22;2018:9064952. doi:  
538 10.1155/2018/9064952. PMID: 29951318; PMCID: PMC5987299.
- 539 42. Lu JJ, Perng CL, Shyu RY, Chen CH, Lou Q, Chong SK, Lee CH. Comparison of five  
540 PCR methods for detection of Helicobacter pylori DNA in gastric tissues. *J Clin*  
541 *Microbiol*. 1999 Mar;37(3):772-4. doi: 10.1128/JCM.37.3.772-774.1999. PMID:  
542 9986850; PMCID: PMC84550.
- 543 43. R Core Team (2021). R: A Language and Environment for Statistical Computing. R  
544 Foundation for Statistical Computing. Vienna, Austria. Available: [https://www.R-](https://www.R-project.org/)  
545 [project.org/](https://www.R-project.org/). [last accessed on August 29th, 2021].
- 546 44. Stevenson, M. & Sergeant, E. with contributions from Nunes, T., Heuer, C., Marshall, J.,  
547 Sanchez, J., Thornton, R., Reiczigel, J., Robison-Cox, J., Sebastiani, P., Solymos, P.,

- 548 Yoshida, K., Jones, G., et al. 2021. epiR: Tools for the Analysis of Epidemiological Data.  
549 Available: <https://CRAN.R-project.org/package=epiR> [last accessed on August 29th,  
550 2021].
- 551 45. Guo J, Starr D, Guo H. Classification and review of free PCR primer design software.  
552 Bioinformatics. 2021 Apr 1;36(22-23):5263-5268. doi: 10.1093/bioinformatics/btaa910.  
553 PMID: 33104196.
- 554 46. Ismail H, Morgan C, Griffiths P, Williams J, Jenkins G. A Newly Developed Nested PCR  
555 Assay for the Detection of Helicobacter pylori in the Oral Cavity. J Clin Gastroenterol.  
556 2016 Jan;50(1):17-22. doi: 10.1097/MCG.0000000000000310. PMID: 25811111.
- 557 47. Khadangi F, Yassi M, Kerachian MA. Review: Diagnostic accuracy of PCR-based  
558 detection tests for Helicobacter Pylori in stool samples. Helicobacter. 2017 Dec;22(6). doi:  
559 10.1111/hel.12444. Epub 2017 Sep 29. PMID: 28961384.
- 560 48. Bustin SA, Mueller R, Nolan T. Parameters for Successful PCR Primer Design. Methods  
561 Mol Biol. 2020;2065:5-22. doi: 10.1007/978-1-4939-9833-3\_2. PMID: 31578684.
- 562 49. Borah P. Primer designing for PCR. Mipograss. September 2011; (3), 134-136
- 563 50. Hinchliff CE, Smith SA. Some limitations of public sequence data for phylogenetic  
564 inference (in plants). PLoS One. 2014 Jul 7;9(7):e98986. doi:  
565 10.1371/journal.pone.0098986. PMID: 24999823; PMCID: PMC4085032.
- 566 51. Deng L, He XY, Tang B, Xiang Y, Yue JJ. An improved quantitative real-time  
567 polymerase chain reaction technology for Helicobacter pylori detection in stomach tissue  
568 and its application value in clinical precision testing. BMC Biotechnol. 2020 Jun

- 569 22;20(1):33. doi: 10.1186/s12896-020-00624-z. PMID: 32571272; PMCID:  
570 PMC7310109.
- 571 52. Park CG, Kim S, Jeon HS, Han S. Validation of loop-mediated isothermal amplification to  
572 detect *Helicobacter pylori* and 23S rRNA mutations: A prospective, observational clinical  
573 cohort study. *J Clin Lab Anal*. 2021 Jan;35(1):e23563. doi: 10.1002/jcla.23563. Epub  
574 2020 Sep 6. PMID: 32893424; PMCID: PMC7843275.
- 575 53. Sohrabi A, Franzen J, Tertipis N, Zagai U, Li W, Zheng Z, Ye W. Efficacy of Loop-  
576 Mediated Isothermal Amplification for *H. pylori* Detection as Point-of-Care Testing by  
577 Noninvasive Sampling. *Diagnostics (Basel)*. 2021 Aug 25;11(9):1538. doi:  
578 10.3390/diagnostics11091538. PMID: 34573879; PMCID: PMC8467764.
- 579 54. Qiu E, Li Z, Han S. Methods for detection of *Helicobacter pylori* from stool sample:  
580 current options and developments. *Braz J Microbiol*. 2021 Dec;52(4):2057-2062. doi:  
581 10.1007/s42770-021-00589-x. Epub 2021 Aug 15. PMID: 34392499; PMCID:  
582 PMC8578210.
- 583 55. Qin H, Tang G, Yi P, Pan X, Huang H, Chang R, Shi Z, Ashraf MA. Diagnosis of Genus  
584 *Helicobacter* through a hemi-nested PCR assay of 16S rRNA. *Saudi Pharm J*. 2016  
585 May;24(3):265-72. doi: 10.1016/j.jsps.2016.04.015. Epub 2016 Apr 26. PMID: 27275113;  
586 PMCID: PMC4881236.
- 587 56. Choi YK, Han JH, Joo HS. Identification of novel *Helicobacter* species in pig stomachs by  
588 PCR and partial sequencing. *J Clin Microbiol*. 2001 Sep;39(9):3311-5. doi:  
589 10.1128/JCM.39.9.3311-3315.2001. PMID: 11526168; PMCID: PMC88336.

- 590 57. Riley LK, Franklin CL, Hook RR, Besch-Williford C. Identification of murine  
591 helicobacters by PCR and restriction enzyme analyses. *Journal of Clinical Microbiology*.  
592 1996; 34:942–946.
- 593 58. Tiwari SK, Khan AA, Ibrahim M, Habeeb MA, Habibullah CM. *Helicobacter pylori* and  
594 other *Helicobacter* species DNA in human bile samples from patients with various hepato-  
595 biliary diseases. *World J Gastroenterol*. 2006 Apr 14;12(14):2181-6. doi:  
596 10.3748/wjg.v12.i14.2181. PMID: 16610018; PMCID: PMC4087643.
- 597 59. Flahou B, Modrý D, Pomajbíková K, Petrželková KJ, Smet A, Ducatelle R, Pasmans F, Sá  
598 RM, Todd A, Hashimoto C, Mulama M, Kiang J, Rossi M, Haesebrouck F. Diversity of  
599 zoonotic enterohepatic *Helicobacter* species and detection of a putative novel gastric  
600 *Helicobacter* species in wild and wild-born captive chimpanzees and western lowland  
601 gorillas. *Vet Microbiol*. 2014 Nov 7;174(1-2):186-94. doi: 10.1016/j.vetmic.2014.08.032.  
602 Epub 2014 Sep 10. PMID: 25248691.
- 603 60. Forssten SD, Björklund M, Ouwehand AC. *Streptococcus mutans*, caries and simulation  
604 models. *Nutrients*. 2010 Mar;2(3):290-8. doi: 10.3390/nu2030290. Epub 2010 Mar 2;  
605 PMID: 22254021; PMCID: PMC3257652.
- 606 61. Idowu A, Mzukwa A, Harrison U, Palamides P, Haas R, Mbao M, Mamdoo R, Bolon J,  
607 Jolaiya T, Smith S, Ally R, Clarke A, Njom H. Detection of *Helicobacter pylori* and its  
608 virulence genes (*cagA*, *dupA*, and *vacA*) among patients with gastroduodenal diseases in  
609 Chris Hani Baragwanath Academic Hospital, South Africa. *BMC Gastroenterol*. 2019  
610 May 14;19(1):73. doi: 10.1186/s12876-019-0986-0. PMID: 31088381; PMCID:  
611 PMC6518451.

612 62. Farshad S, Rasouli M, Alborzi A. Simultaneous detection of Helicobacter genus and  
613 Helicobacter pylori species using a multiplex PCR method. Iranian Biomedical Journal.  
614 2004;8:205–209.

615

616

617

618

619

620

621

622

## Tables

*Table 1: the sequence of different primers for detection of G: Helicobacter*

| Primer        | Sequence                                  | Length | GC%  | Tm°C | PCR product | Reference |
|---------------|-------------------------------------------|--------|------|------|-------------|-----------|
| H276 F        | 5'-CTA TGA CCG GTA TCC GGC-3'             | 18     | 61.1 | 55.4 | 376 bp      | (57)      |
| H676 R        | 5'-ATT CCA CCT ACC TCT CCC A-3'           | 19     | 52.6 | 54.8 |             |           |
| 16S rRNA(b)-F | 5'-CTG GAG AGA CTA AGC CCT CC-3'          | 20     | 60   | 57.4 | 112 bp      | (59)      |
| 16S rRNA(b)-R | 5'-ATT ACT GAG GCT GAT TGT GC-3'          | 20     | 45   | 52.8 |             |           |
| 16srRNA(a)-F  | 5'-TAA GAG ATC AGC CTA TAT GTC C-3'       | 22     | 40.9 | 50.1 | 534 bp      | (58)      |
| 16srRNA(a)-R  | 5'-TCC CAG GCT TTA AGC GCA AT-3'          | 20     | 50   | 57.8 |             |           |
| Hcom1         | 5'-GTA AAG GCT CAC CAA GGC TAT-3'         | 21     | 47.5 | 54.5 | 390 bp      | (56)      |
| Hcom2         | 5'-CCA CCT ACC TCT CCC ACA CTC-3'         | 21     | 61.9 | 59.8 |             |           |
| BHpyl_F       | 5'-AAA GAG CGT GGT TTT CAT GGC G-3'       | 22     | 50   | 58.9 | 217 bp      | (59)      |
| BHpyl_R       | 5'-GGG TTT TAC CGC CAC CGA ATT TAA-3'     | 24     | 45.8 | 57.9 |             |           |
| Heid F        | 5'-ATG GCT TAC AAC CCT AAA ATT TTA CAA-3' | 27     | 34.4 | 57.4 | 1278 bp     | (62)      |
| Heid R        | 5'-TCA CAT GTT TTC AAT CAT CAC GC-3'      | 23     | 39.1 | 53.6 |             |           |
| Outer forward | 5'-CTG GCG GCG TGC CTA ATA C-3'           | 19     | 63.2 | 59.7 | 1054 bp     | (55)      |
| Outer reverse | 5'-CTC ACG ACA CGA GCT GAC-3'             | 18     | 61.1 | 56.2 |             |           |
| Inner forward | 5'-CTG GCG GCG TGC CTA ATA C-3'           | 19     | 63.2 | 59.7 | 256 bp      | (55)      |
| Inner reverse | 5'-ACC CTC TCA GGC CGG ATA CC-3'          | 20     | 65   | 62.1 |             |           |
| Heli-nestS    | 5'-ATT AGT GGC GCA CGG GTG AGT AA-3'      | 23     | 52.2 | 61.1 | 1315 bp     | (58)      |
| Heli-nestR    | 5'-TTT AGC ATC CCG ACT TAA GGC-3'         | 21     | 47.6 | 54.7 |             |           |
| Heli-S        | 5'-GAA CCT TAC CTA GGC TTG ACA TTG-3'     | 24     | 45.8 | 55.4 | 426 bp      | (58)      |
| Heli-R        | 5'-GGT GAG TAC AAG ACC CGG GAA-3'         | 21     | 57.1 | 59.3 |             |           |





Table 2: the conserved sequence of 16srRNA gene in *G. Helicobacter* and *H. pylori*

| Genus/spp.          | Conserved area                                                                                                                                                                                                                                                                                                                                                                                                                                                                                                                                                                                                                                                                                                                                                                                                                                                                                                                                                                                                                                                                                                                                                                                                                                                                             |
|---------------------|--------------------------------------------------------------------------------------------------------------------------------------------------------------------------------------------------------------------------------------------------------------------------------------------------------------------------------------------------------------------------------------------------------------------------------------------------------------------------------------------------------------------------------------------------------------------------------------------------------------------------------------------------------------------------------------------------------------------------------------------------------------------------------------------------------------------------------------------------------------------------------------------------------------------------------------------------------------------------------------------------------------------------------------------------------------------------------------------------------------------------------------------------------------------------------------------------------------------------------------------------------------------------------------------|
| <b>Genus</b>        | GTGGATTAGTGGCGCACGGGTGAGTAACGCATAGGTTATGTGCCTCTTAGTTTGGGATAGCCATTGGAAACGGTGATT                                                                                                                                                                                                                                                                                                                                                                                                                                                                                                                                                                                                                                                                                                                                                                                                                                                                                                                                                                                                                                                                                                                                                                                                             |
| <b>Helicobacter</b> | AATACCAGATATTCCTACGGGGGAAAGATTTATCGCTAAGAGATCAGCCTATGCCCTATCAGCTTGTGGTAAGGTA<br>ATGGCTTACCAAGGCTATGACGGGTATCCGGTCTGAGAGGGTGAACGGACACACTGGAAGTGAACACGGTCCAGAC<br>TCCTACGGGAGGCAGCAGTAGGGAATATTGCTCAATGGGGGAAACCCTGAAGCAGCAACGCCGCGTGGAGGATGAA<br>GGTTTTAGGATTGTAAACTCCTTTTGTGAGAGAAGATAATGACGGTATCTGACGAATAAGCACCGGCTAACTCCGTGC<br>CAGCAGCCGCGTAATACGGAGGGTGCAAGCGTACTCGGAATCACTGGGCGTAAAGAGCGCGTAGGCCGGGATAGT<br>CAGTCAGGTGTGAAATCCTATGGCTTAACCATAGAACTGCATTTGAAACTGCTATTCTAGAGTGTGGGAGAGGCAGG<br>TGGAATCCTTGGTGTAGGGGTAAAAATCCGTAGAGATCAAGAGGAATACTCATTGCGAAGGCGACCTGCTAGAACATG<br>ACTGACGCTGATTGCGCGAAAGCGTGGGGAGCAAACAGGATTAGATACCCTGGTAGTCCACGCCCTAAACGATGGAT<br>GCTAGTTGTTGGAGGGCTTAGTCTCTCCAGTAATGCAGCTAACGCCTTAAGCATCCCGCCTGGGGAGTACGGTCGCAA<br>GATTAAAACTCAAAGGAATAGACGGGGACCCGCACAAGCGGTGGAGCATGTGGTTTAATTGGAAGATACACGAAGA<br>ACCTTACCTAGGCTTGACATTGAGAGAATCCGCTAGAAAATAGCGGGGTGTCTGGCTTGCCAGACCTGAAAAACAGGT<br>GCTGCACGGCTGTCGTCAGCTCGTGTGAGATGTTGGGTAAAGTCCCGCAACGAGCGCAACCCCTTTCTTAGTTG<br>CTAACAGGTCATGCTGAGAACTTAAGGAGACTGCCTCCGTAAGGAGGAGGAAGGTGGGGACGACGTCAAGTCATC<br>ATGGCCCTTACGCCTAGGGCTACACACGTGCTACAATGGGGTGCACAAAGAGAAGCGATACTGCGAAGTGGAGCCAA<br>TCTTCAAAACATCTCTCAGTTCGGATTGACAGGCTGCAACTCGCCTGCATGAAGCTGGAATCGCTAGTAATCGCAAATC<br>AGCCATGTTGCGGTGAATACGTTCCCGGTCTT |
| <b>Helicobacter</b> | GAGTTTGATCCTGGCTCAGAGTGAACGCTGGCGGCGTGCCTAATACATGCAAGTCGAACGATGAAGCTTTCTAGCTTG                                                                                                                                                                                                                                                                                                                                                                                                                                                                                                                                                                                                                                                                                                                                                                                                                                                                                                                                                                                                                                                                                                                                                                                                             |

---

**pylori**

CTAGAAGGCTGATTAGTGGCGCACGGGTGAGTAACGCATAGGTTATGTGCCTCTAGTTTGGGATAGCCATTGGAAA  
CGATGATTAATACCAGATACTCCCTACGGGGGAAAGATTTATCGCTAAGAGATCAGCCTATGTCCTATCAGCTTGTG  
GTAAGGTAATGGCTTACCAAGGCTATGACGGGTATCCGGCCTGAGAGGGTGAACGGACACACTGGAAGTGAACAC  
GGTCCAGACTCCTACGGGAGGCAGCAGTAGGGAATATTGCTCAATGGGGGAAACCTGAAGCAGCAACGCCGCGTG  
GAGGATGAAGGTTTTAGGATTGTAACTCCTTTTGTAGAGAAGATAATGACGGTATCTAACGAATAAGCACCGGCT  
AACTCCGTGCCAGCAGCCGCGGTAATACGGAGGGTGCAAGCGTACTCGGAATCACTGGGCGTAAAGAGCGCGTAGG  
CGGGATAGTCAGTCAGGTGTGAAATCCTATGGCTTAACCATAGAAGTGCATTTGAAACTACTATTCTAGAGTGTGGGA  
GAGGTAGGTGGAATCTTGGTGTAGGGGTAATCCGTAGAGATCAAGAGGAATACTCATGCGAAGGCGACCTGCT  
GGAACATTACTGACGCTGATTGCGGAAAGCGTGGGGAGCAAAACAGGATTAGATACCCTGGTAGCCACGCCCTAAA  
CGATGGATGCTAGTTGTTGGAGGGCTTAGTCTCTCCAGTAATGCAGCTAACGCATTAAGCATCCCGCCTGGGGAGTAC  
GGTCGCAAGATTAANAACCTCAAAGGAATAGACGGGGACCCGCACAAGCGGTGGAGCATGTGGTTAATTCGAAGATA  
CACGAAGAACCTTACCTAGGCTTGACATTGAGAGAATCCGCTAGAAAATAGTGGAGTGTCTGGCTTGCCAGACCTTGA  
AAACAGGTGCTGCACGGCTGTCGTCAGCTCGTGTGAGATGTTGGGTTAAGTCCCGCAACGAGCGCAACCCCTTT  
CTTAGTTGCTAACAGGTCATGCTGAGAAGTCTAAGGATACTGCCTCCGTAAGGAGGAGGAAGGTGGGGACGACGTC  
AGTCATCATGGCCCTTACGCCTAGGGCTACACACGTGCTACAATGGGGTGCACAAAGAGAAGCAATACTGCGAAGTG  
GAGCCAATCTTCAAAAACACCTCTCAGTTCCGATTGTAGGCTGCAACTCGCCTGCATGAAGCTGGAATCGCTAGTAATC  
GCAAATCAGCCATGTTGCGGTGAATACGTTCCCGGGTCTTGTACTCACCGCCCGTCAACACAGCGACTGGGGTGAAGT  
CGTAACAAGGTAACCGTA

---

*Table 3: Sequence of the newly designed primers in the study*

| <b>Primer name</b> | <b>Sequence</b>       | <b>GC content</b>                        | <b>TM</b> | <b>Product size bp</b> |             |
|--------------------|-----------------------|------------------------------------------|-----------|------------------------|-------------|
| ConsH              | <b>Forward primer</b> | <b>TCG CTA AGA GAT CAG CCT ATG TCC T</b> | <b>48</b> | <b>65.8</b>            | <b>435</b>  |
|                    | <b>Reverse Primer</b> | <b>ATT CCA CCT ACC TCT CCC ACA CT</b>    | <b>52</b> | <b>64.7</b>            |             |
| PyloA              | <b>Forward primer</b> | <b>TTG ATC CTG GCT CAG AGT GAA CG</b>    | <b>52</b> | <b>64.7</b>            | <b>1274</b> |
|                    | <b>Reverse primer</b> | <b>TGC AGC CTA CAA TCC GAA CTG AG</b>    | <b>52</b> | <b>64.7</b>            |             |
| PyloAN             | <b>Forward primer</b> | <b>GGT GGA ATT CTT GGT GTA GGG GT</b>    | <b>52</b> | <b>64.7</b>            | <b>160</b>  |
|                    | <b>Reverse primer</b> | <b>TAG CAT CCA TCG TTT AGG GCG TG</b>    | <b>52</b> | <b>64.7</b>            |             |

*Table 4: Screening primers test results of insilico PCR for detection of 62 Helicobacter strains.*

| <b>Gold standard</b> | <b>Screening Primers</b> | <b>SEN (%)</b> | <b>SPC (%)</b> | <b>PPV (%)</b> | <b>NPV (%)</b> | <b>FPR (%)</b> | <b>FNR (%)</b> | <b>Acc (%)</b> | <b>BA (%)</b> | <b>LR+</b> | <b>LR-</b> | <b>DOR</b> | <b>X<sup>2</sup></b> | <b>P value</b> |
|----------------------|--------------------------|----------------|----------------|----------------|----------------|----------------|----------------|----------------|---------------|------------|------------|------------|----------------------|----------------|
| <b>CONSH</b>         | <b>Hcom1</b>             | 100            | 50             | 98.4           | 100            | 50             | 0.0            | 98.4           | 75            | 2.0        | 0.0        | -          | 7.12                 | 0.01           |
|                      | <b>H276</b>              | 98.3           | 50             | 98.3           | 50.0           | 50.0           | 1.7            | 96.8           | 74.2          | 1.97       | 0.033      | 59         | 3.140                | 0.076          |
|                      | <b>Outer + Inner</b>     | 100            | 100            | 100            | 100            | 0.0            | 0.0            | 100            | 100           | NA         | 0.0        | -          | 34.10                | 0.0001         |
|                      | <b>Heli-nestS + Heli</b> | 8.3            | 50             | 83.3           | 1.8            | 50             | 91.7           | 9.7            | 29.2          | 0.17       | 1.83       | 0.09       | 0.555                | 0.456          |

*SEN: sensitivity; SPC: specificity; PPV: Positive predictive value; NPN: Negative predictive value; FPR: False positive rate; FNR: False-negative rate; ACC: Accuracy; BA: Balanced accuracy; LR+: Positive likelihood ratio; LR-: Negative likelihood ratio; DOR: Diagnostic odds ratio. 16S rRNA, hspG, and Heid primers tested negative in the detection of all 62 Helicobacter species. 16S rRNA and BFHpyl primers tested negative in the detection of 61 Helicobacter species.*

Table 5: Screening primers results for detection of *Helicobacter* spp. (n= 8) and Non-*Helicobacter* spp. (n= 10)

| <b>Gold standard Primer</b> | <b>Screening Primer</b>  | <b>SEN (%)</b> | <b>SPC (%)</b> | <b>PPV (%)</b> | <b>NPV (%)</b> | <b>FPR (%)</b> | <b>FNR (%)</b> | <b>Acc (%)</b> | <b>BA (%)</b> | <b>LR+</b> | <b>LR-</b> | <b>DOR</b> | <b>X<sup>2</sup></b> | <b>P value</b> |
|-----------------------------|--------------------------|----------------|----------------|----------------|----------------|----------------|----------------|----------------|---------------|------------|------------|------------|----------------------|----------------|
| <b>CONSH</b>                | <b>H276</b>              | 100            | 90.0           | 88.9           | 100.0          | 10.0           | 0.0            | 94.4           | 95            | 10.0       | 0.0        | -          | 11.025               | 0.001          |
|                             | <b>16 XF</b>             | 100            | 90.0           | 88.9           | 100.0          | 10.0           | 0.0            | 94.4           | 95            | 10.0       | 0.0        | -          | 11.025               | 0.001          |
|                             | <b>Heli-nestS + Heli</b> | 100            | 90.0           | 88.9           | 100.0          | 10.0           | 0.0            | 94.4           | 95            | 10.0       | 0.0        | -          | 11.025               | 0.001          |
|                             | <b>Hcom1</b>             | 100            | 90.0           | 88.9           | 100.0          | 10.0           | 0.0            | 94.4           | 95            | 10.0       | 0.0        | -          | 11.025               | 0.001          |
|                             | <b>16S rRNA</b>          | 75.0           | 100            | 100            | 83.3           | 0.0            | 25             | 88.9           | 87.5          | -          | 0.25       | -          | 8.128                | 0.004          |
|                             | <b>Outer + Inner</b>     | 100            | 0.0            | 44.4           | -              | 100            | 0.0            | 44.4           | 50            | 1.0        | -          | -          | -                    | -              |
|                             | <b>BFHpyl</b>            | 12.5           | 90             | 50             | 56.3           | 10             | 87.5           | 55.6           | 51.3          | 1.25       | 0.97       | 1.29       | 0.00                 | 1              |
| <b>Heid</b>                 | 0.0                      | 90             | 0.0            | 52.9           | 10             | 100            | 50.0           | 45             | 0.0           | 1.11       | 0.0        | 0.00       | 1                    |                |

*SEN*: sensitivity; *SPC*: specificity; *PPV*: Positive predictive value; *NPN*: Negative predictive value; *FPR*: False positive rate; *FNR*: False-negative rate; *ACC*: Accuracy; *BA*: Balanced accuracy; *LR+*: Positive likelihood ratio; *LR-*: Negative likelihood ratio; *DOR*: Diagnostic odds ratio.



## Figure Legends

Figure 1. Gel electrophoresis of PCR products of A. *ConsH* amplified products(435bp) B. *PyloA* amplified products (1274bp) C. *PyloAN* amplified products (160 bp) in reference to 100 bp DNA ladder.

Figure 2. A, Sensitivity testing of primers *ConsH* and C, Sensitivity testing of *PyloA* using Stool clinical sample DNA with different concentrations. B, Sensitivity testing of Primers *ConsH* and D, Sensitivity testing of *PyloA* using biopsy clinical sample DNA with different concentrations.

Figure 3 ROC curve of Insilco comparison by PCR amplification. Null hypothesis: true area = 0.5, AUC: A, ROC curve of *ConsH* and *Hcom1* primers for detection of 62 *Helicobacter* strains, AUC represents the accuracy of the screening test (0.750). B, ROC curve of *ConsH* and H276 primers, AUC represents the accuracy of the screening test (0.742).C, ROC curve of *ConsH* and Outer + Inner primers, AUC represents the accuracy of the screening test (1.00).

Figure 4 ROC curve of laboratory comparison of all primers using *Helicobacter* spp. (n= 8) and non-*Helicobacter* spp. (n= 10). Null hypothesis: true area = 0.5, AUC: Area under the curve. A, ROC curve of *ConsH* and H276 primers, AUC represents the accuracy of the screening test (0.950). B, ROC curve of *ConsH* and 16srRNA (a) primers, AUC represents the accuracy of the screening test (0.950). C, ROC curve of *ConsH* and *Hcom1* primers, AUC represents the accuracy of the screening test (0.950). D, ROC curve of *ConsH* and *Heli-nestS* + *Heli* primers, AUC represents the accuracy of the screening test (0.950). E, ROC curve of *ConsH* and 16S rRNA primers, AUC represents the accuracy of the screening test (0.875). F, ROC curve of *ConsH* and Outer + Inner primers, AUC represents the accuracy of the screening test (0.500). G, ROC curve of *ConsH* and *Heid* primers, AUC represents the accuracy of the screening test (0.450). H, ROC curve of *ConsH* and *BFHpyl* primers, AUC represents the accuracy of the screening test (0.513).





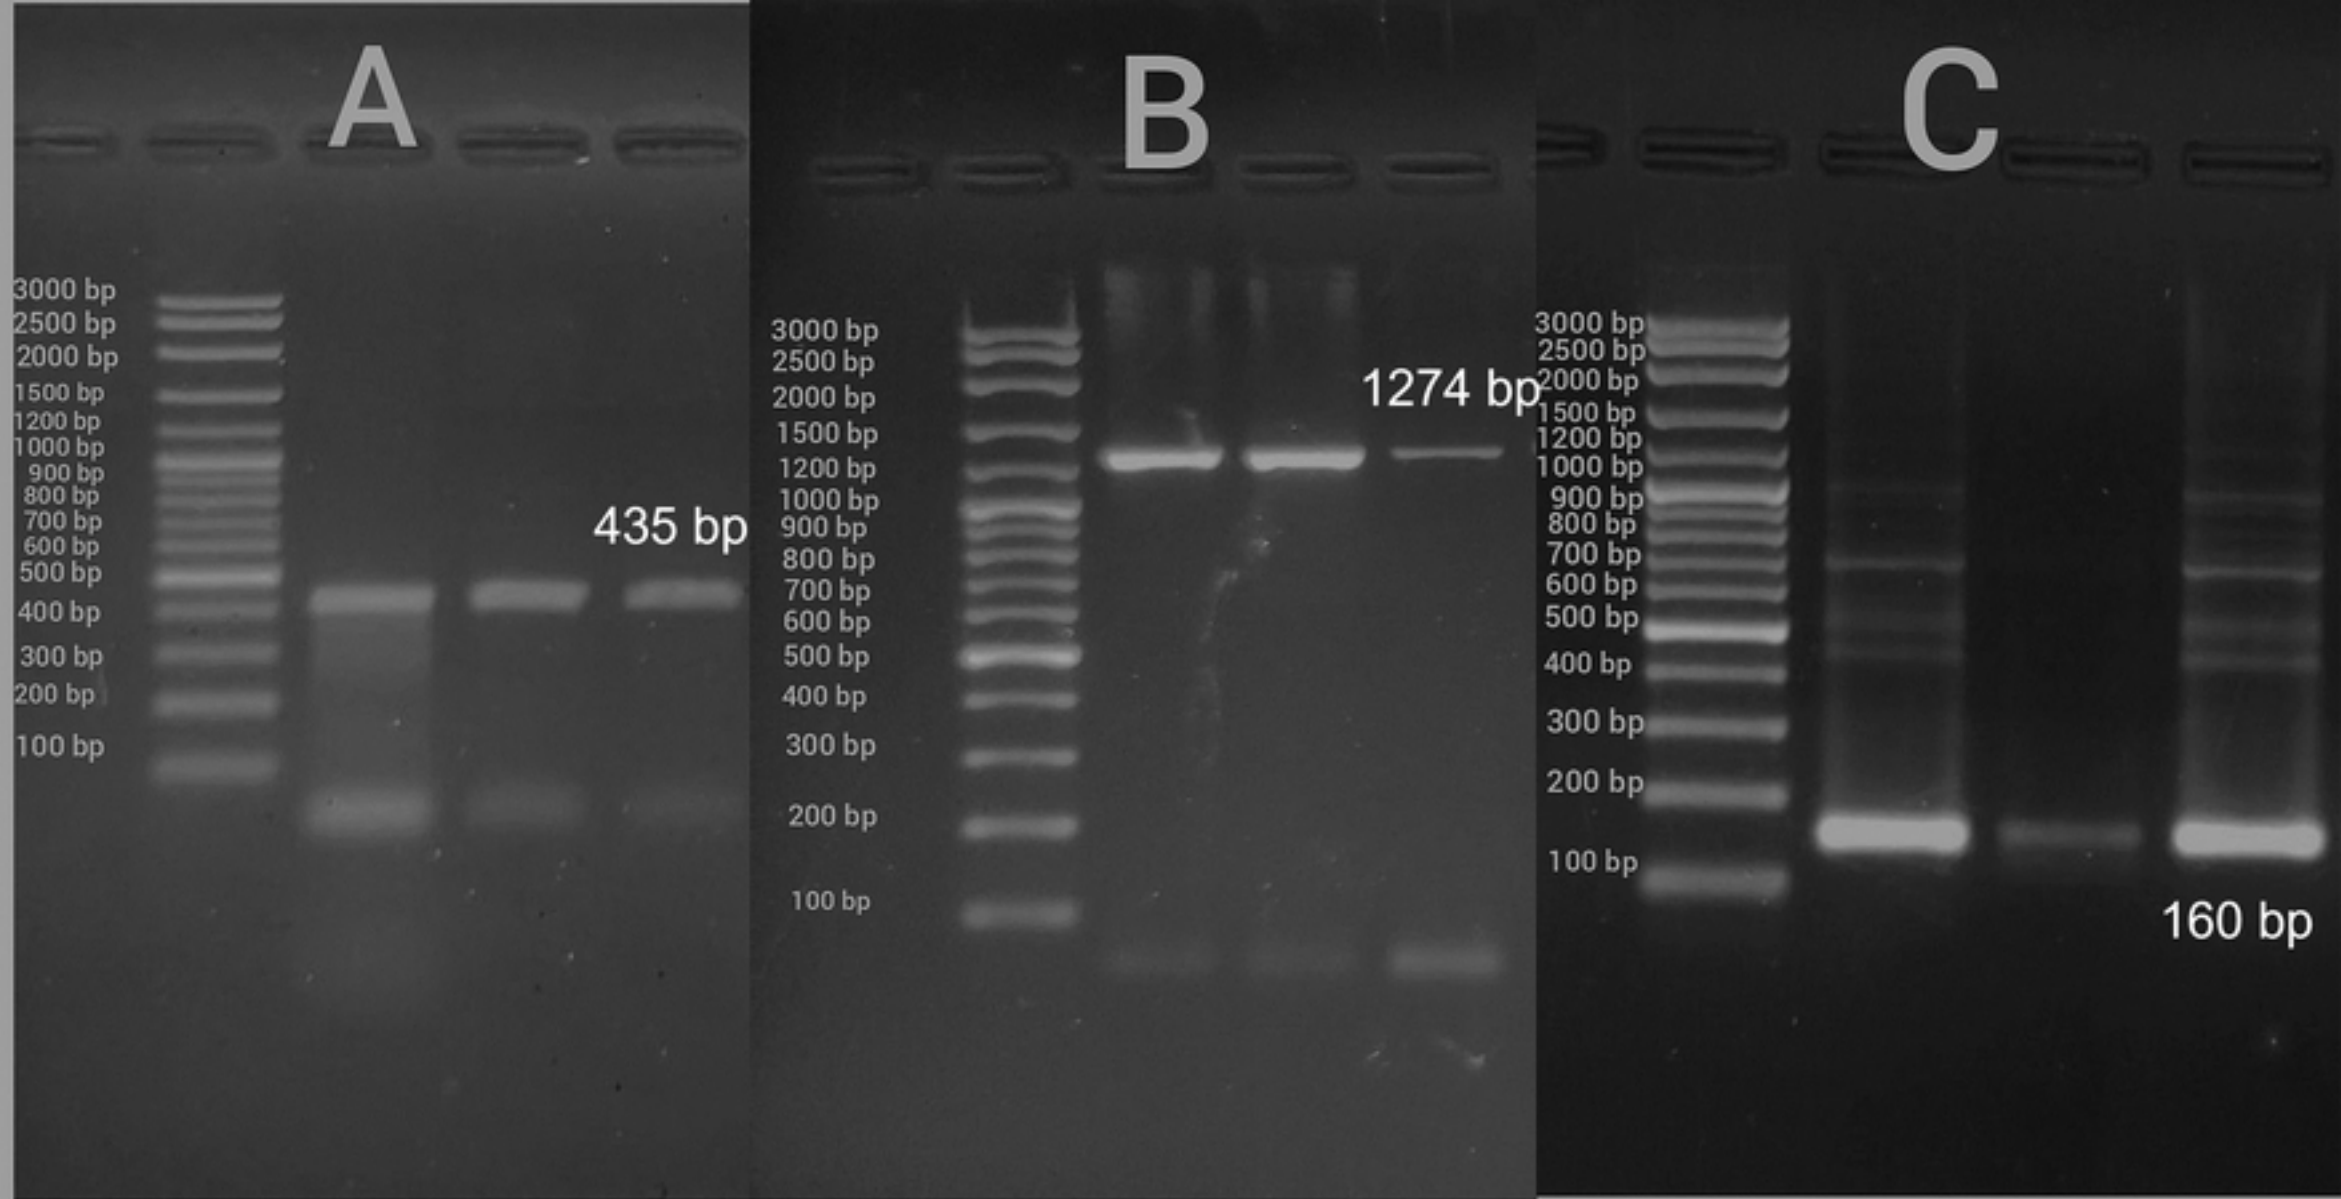

Figure 1

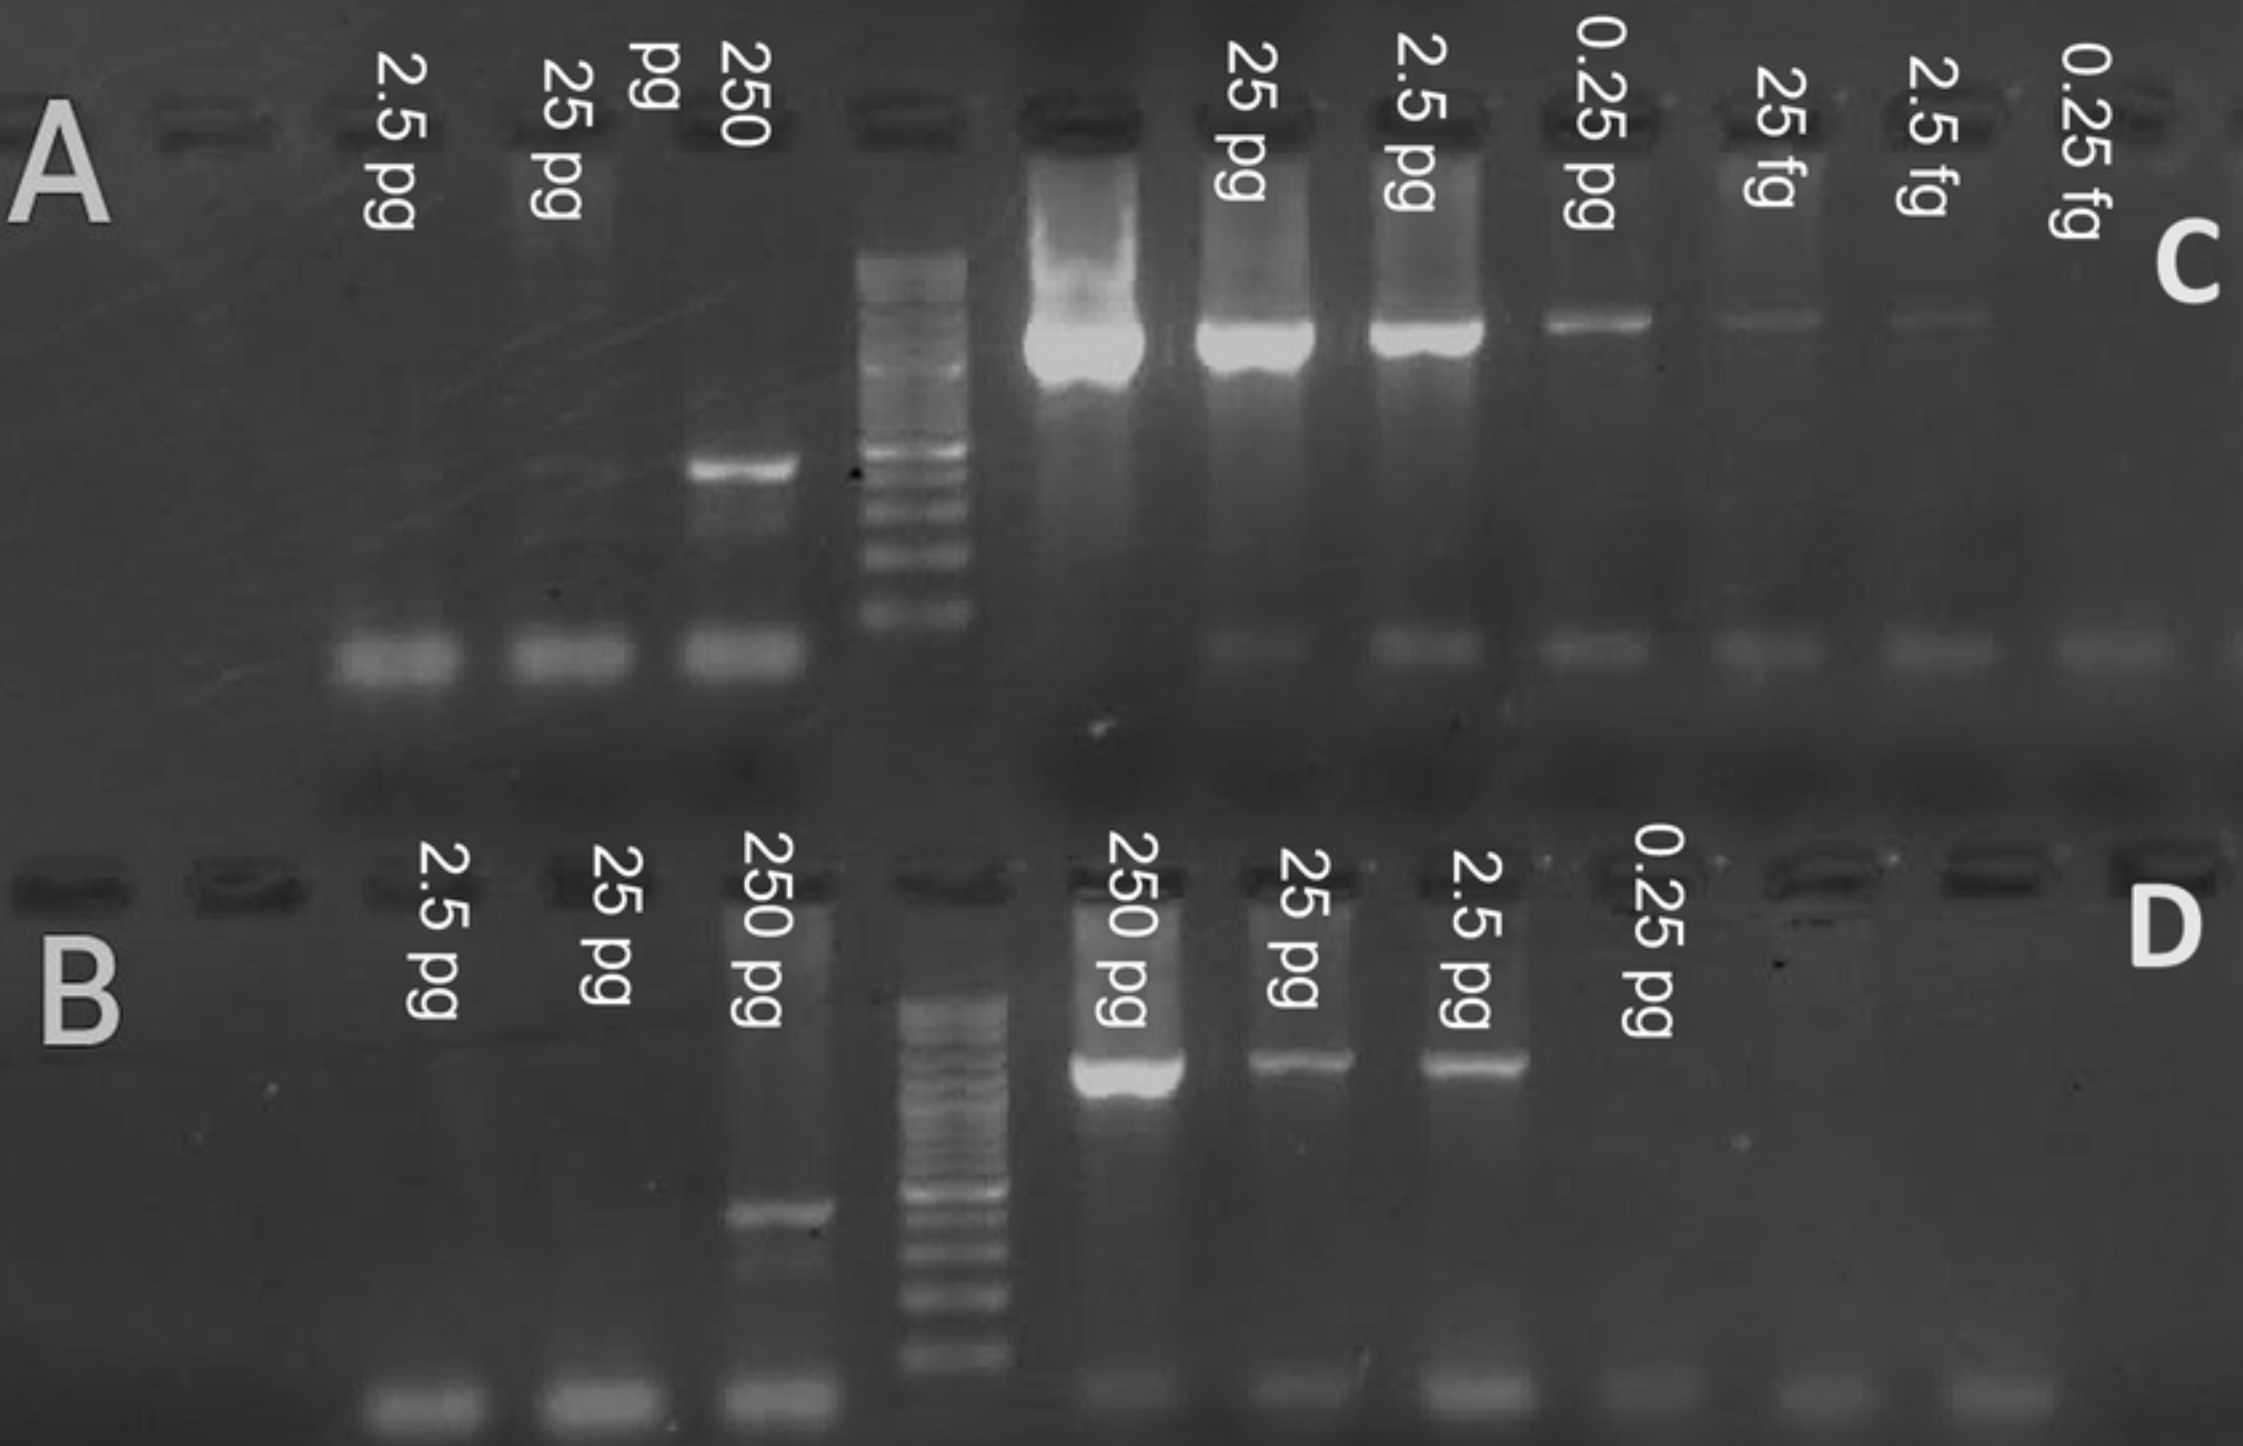

Figure 2

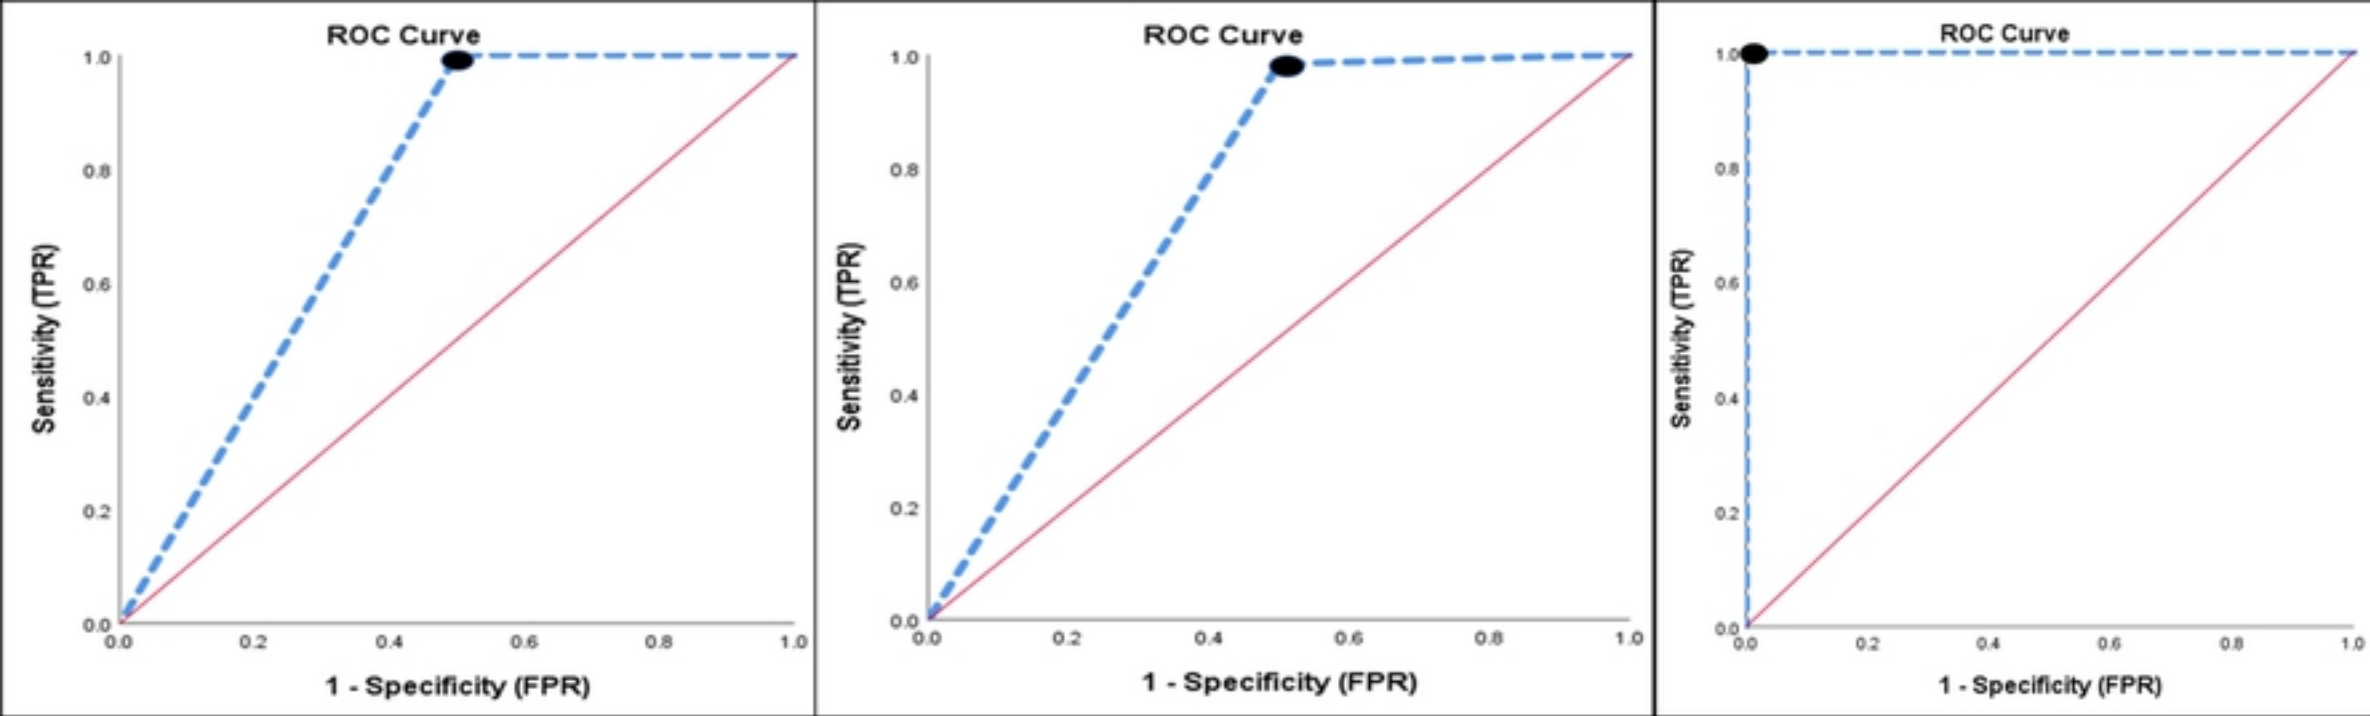

Figure 3

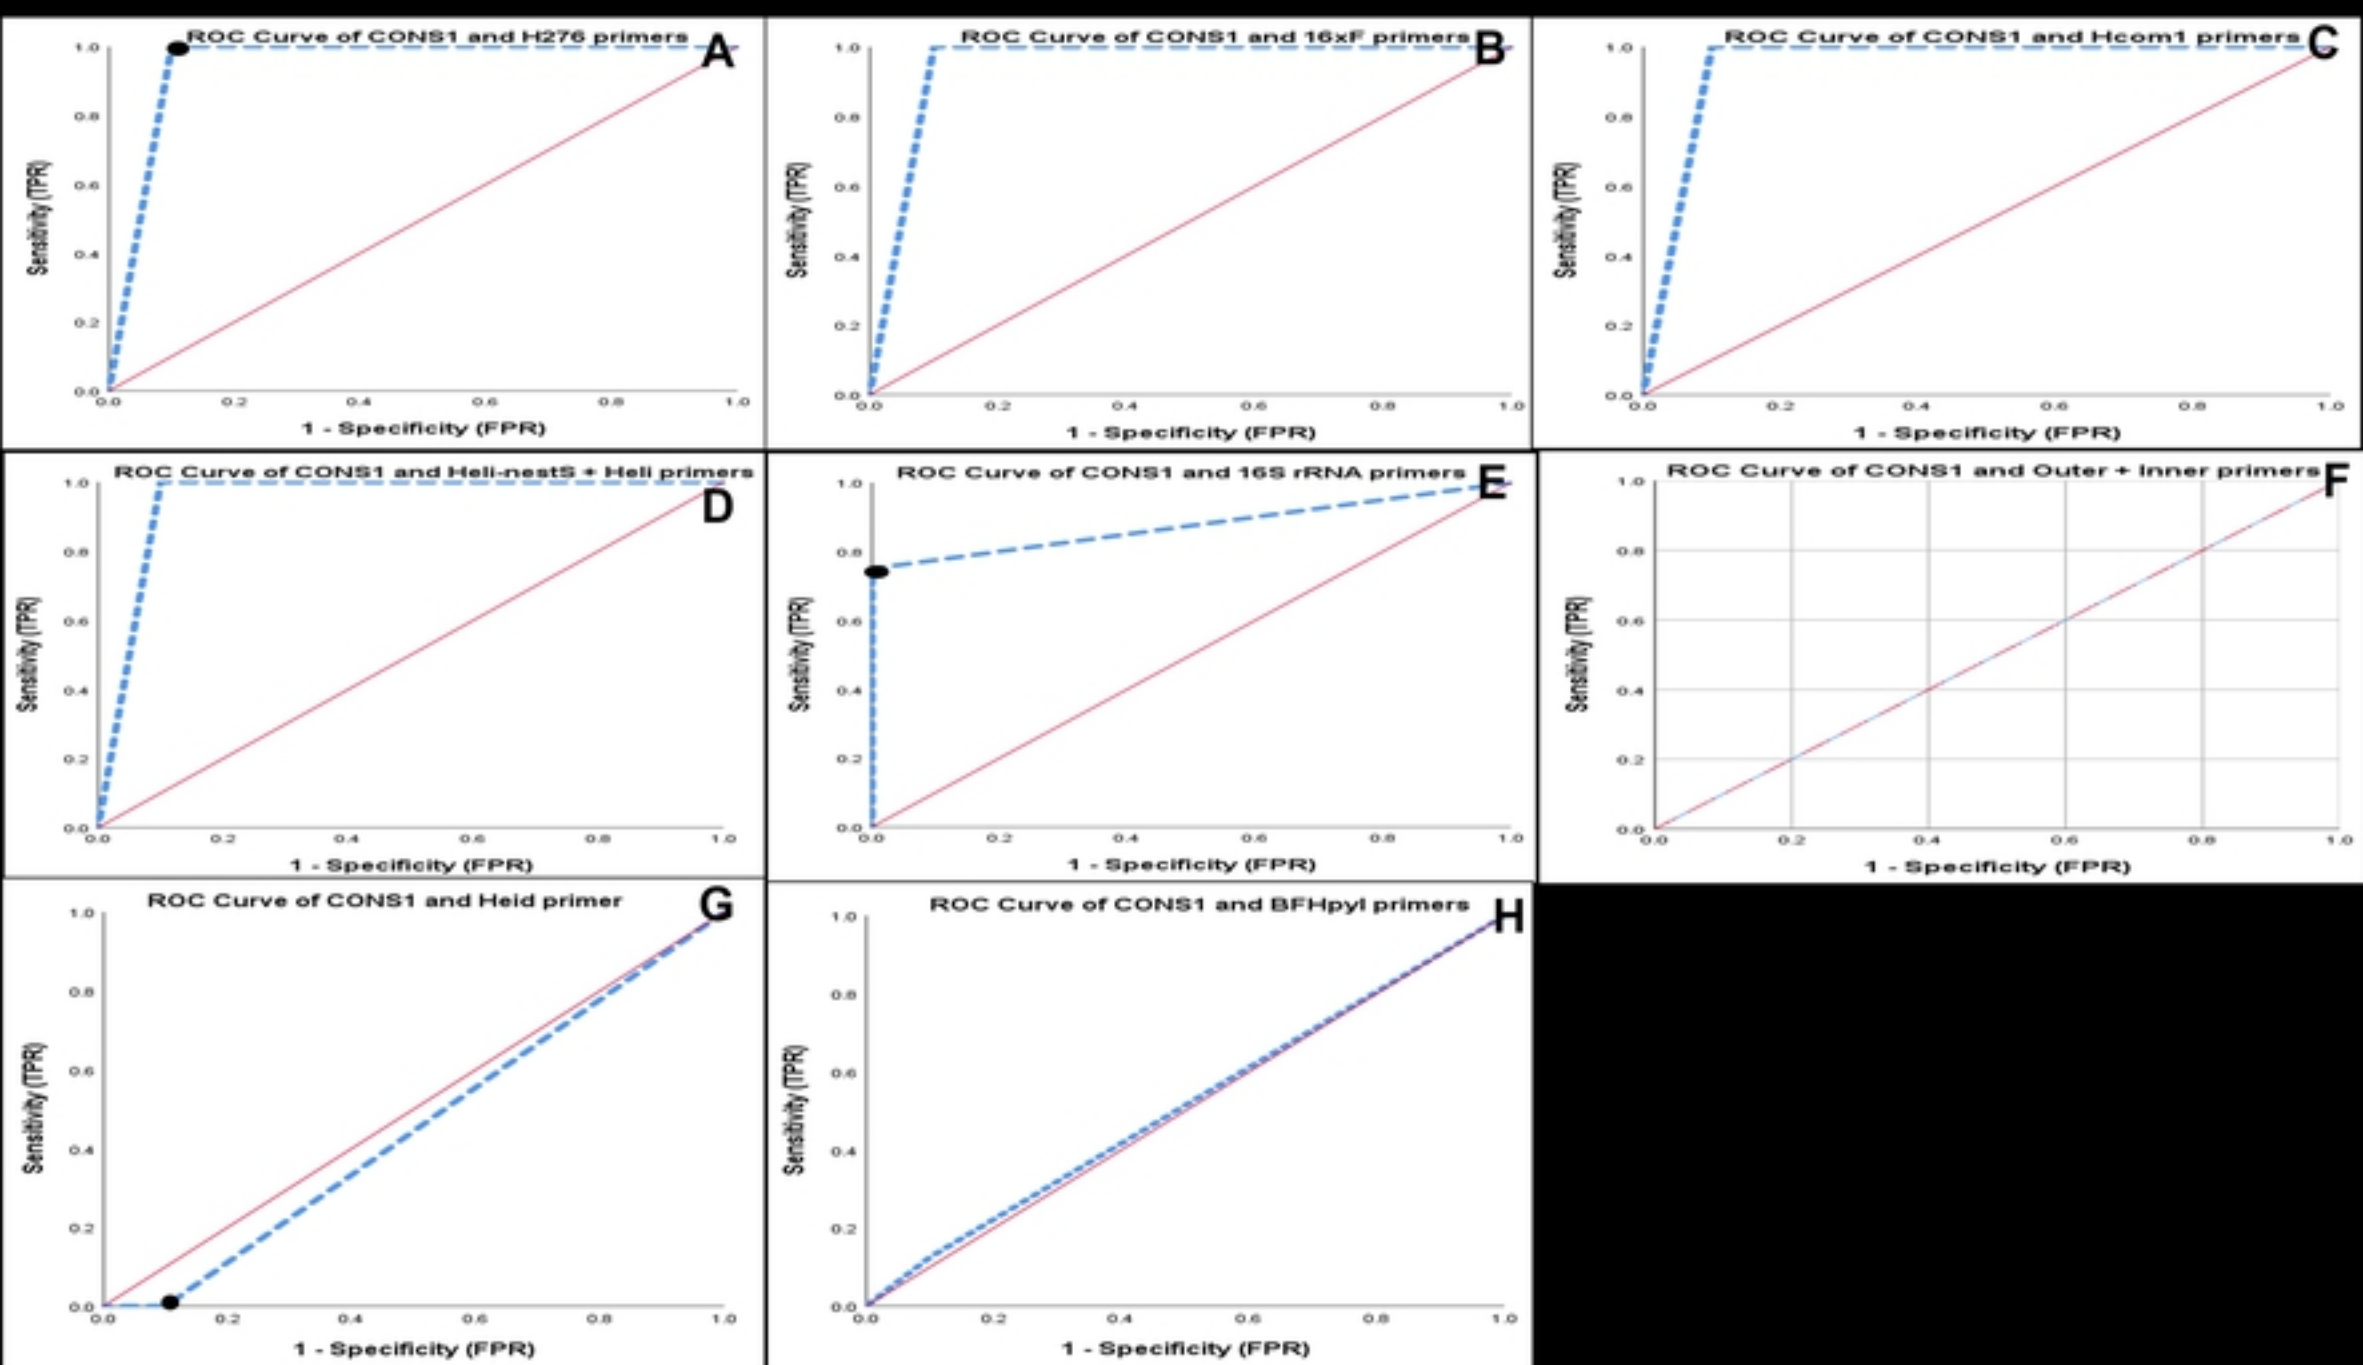

Figure 4
